# Supplementary material for: Predicting Blood–Brain Barrier Permeability of Marine-Derived Kinase Inhibitors Using Ensemble Classifiers Reveals Potential Hits for Neurodegenerative Disorders
Source: MDPI journal article supplement (doi:10.3390/md17020081), 2019-01-29
Supplement: s1 [file s1]

**Supplementary Materials:**

# **Predicting blood-brain barrier permeability of marine-derived kinase inhibitors using ensemble classifiers reveals potential hits for neurodegenerative disorders**

**Fabien Plisson<sup>1,3\*</sup> and Andrew M. Piggott<sup>2,3</sup>**

<sup>1</sup> CONACYT, Unidad de Genómica Avanzada, Laboratorio Nacional de Genómica para la Biodiversidad (Langebio), Centro de Investigación y de Estudios Avanzados del IPN, Irapuato, Guanajuato 36824, Mexico

<sup>2</sup> Institute for Molecular Bioscience, The University of Queensland, St. Lucia, QLD 4072, Australia

<sup>3</sup> Department of Molecular Sciences, Macquarie University, Sydney, NSW 2109, Australia  
andrew.piggott@mq.edu.au

\* Correspondence: [fabien.plisson@cinvestav.mx](mailto:fabien.plisson@cinvestav.mx); Tel.: +52-(1)-462-166-3000; ext. 3036.

**Table S1** RDKit Descriptors definitions

| Descriptor / Descriptor Family                                                                                                                                                                   | Definition                                                                                                                                                                                                                                                                                                                                                                                                                        | References                                                |
|--------------------------------------------------------------------------------------------------------------------------------------------------------------------------------------------------|-----------------------------------------------------------------------------------------------------------------------------------------------------------------------------------------------------------------------------------------------------------------------------------------------------------------------------------------------------------------------------------------------------------------------------------|-----------------------------------------------------------|
| Gasteiger / Marsili Partial Charges                                                                                                                                                              | Marsili-Gasteiger atomic partial charges                                                                                                                                                                                                                                                                                                                                                                                          | <i>Tetrahedron</i> <b>36</b> :3219-28 (1980)              |
| BalabanJ                                                                                                                                                                                         | Balaban's J topological index                                                                                                                                                                                                                                                                                                                                                                                                     | <i>Chem. Phys. Lett.</i> <b>89</b> :399-404 (1982)        |
| BertzCJ                                                                                                                                                                                          | Bertz CJ index                                                                                                                                                                                                                                                                                                                                                                                                                    | <i>J. Am. Chem. Soc.</i> <b>103</b> :3599-601 (1981)      |
| Ipc                                                                                                                                                                                              | Information on polynomial coefficients                                                                                                                                                                                                                                                                                                                                                                                            | <i>J. Chem. Phys.</i> <b>67</b> :4517-33 (1977)           |
| HallKierAlpha<br>Kappa1 – Kappa3<br>Chi0, Chi1<br>Chi0n – Chi4n<br>Chi0v – Chi4v                                                                                                                 | Hall and Kier shape index<br>Kappa shape indices<br>Atomic and carbon connectivity indices<br>Atomic and carbon nVal connectivity indices<br>Atomic and carbon valence connectivity indices                                                                                                                                                                                                                                       | <i>Rev. Comput. Chem.</i> <b>2</b> :367-422 (1991)        |
| MolLogP<br>MolMR                                                                                                                                                                                 | Molecular partition coefficient octanol/water<br>Molecular refractivity                                                                                                                                                                                                                                                                                                                                                           | Wildman and Crippen <i>JCICS</i> <b>39</b> :868-73 (1999) |
| TPSA                                                                                                                                                                                             | Total polar surface area                                                                                                                                                                                                                                                                                                                                                                                                          | <i>J. Med. Chem.</i> <b>43</b> :3714-7, (2000)            |
| LabuteASA<br>PEOE_VSA1 – PEOE_VSA14<br>SMR_VSA1 – SMR_VSA10<br>SlogP_VSA1 – SlogP_VSA12<br>EState_VSA1 – EState_VSA11<br>VSA_EState1 - VSA_EState10                                              | Labute's apolar surface area<br>MOE-type descriptors using partial charges and surface area contributions<br>MOE-type descriptors using MR contributions and surface area contributions<br>MOE-type descriptors using LogP contributions and surface area contributions<br>MOE-type descriptors using EState indices and surface area contributions<br>MOE-type descriptors using EState indices and surface area contributions   | <i>J. Mol. Graph. Mod.</i> <b>18</b> :464-77 (2000)       |
| MQNs                                                                                                                                                                                             | Molecular quantum numbers                                                                                                                                                                                                                                                                                                                                                                                                         | <i>ChemMedChem</i> <b>4</b> :1803-5 (2009)                |
| HeavyAtomCount<br>NumHeteroatoms<br>NumRotatableBonds<br>NumValenceElectrons<br>NumAmideBonds<br>Num{ }Rings<br>Num{ }cycles<br>RingCount<br>FractionCSP3<br>NumSpiroAtoms<br>NumBridgeheadAtoms | Count of heavy atoms<br>Number of heteroatoms<br>Number of rotatable bonds<br>Number of valence electrons<br>Number of amide bonds<br>Number of aromatic, aliphatic and saturated rings<br>Number of hetero- and carbo- cycles<br>Total number of rings<br>Fraction of carbons sp3<br>Number of spiro atoms - single atom shared between rings<br>Number of bridgehead atoms - atom forming at least 2 bonds shared between rings |                                                           |

<https://www.rdkit.org/docs/GettingStartedInPython.html#rkiner2>

**Table S2** RDKit fragments definitions

| Fragments          | Definition                                                                   |
|--------------------|------------------------------------------------------------------------------|
| NHOHCount          | Number of NHs and OHs                                                        |
| NOCCount           | Number of Nitrogen and Oxygen atoms                                          |
| NumHAcceptors      | Number of Hydrogen Bond Acceptors                                            |
| NumHDonors         | Number of Hydrogen Bond Donors                                               |
| fr-Al-COO          | Number of aliphatic carboxylic acids                                         |
| fr-Al-OH           | Number of aliphatic hydroxyl groups                                          |
| fr-Al-OH-noTert    | Number of aliphatic hydroxyl groups excluding tert-OH                        |
| fr-ArN             | Number of N functional groups attached to aromatics                          |
| fr-Ar-COO          | Number of Aromatic carboxylic acids                                          |
| fr-Ar-N            | Number of aromatic nitrogens                                                 |
| fr-Ar-NH           | Number of aromatic amines                                                    |
| fr-Ar-OH           | Number of aromatic hydroxyl groups                                           |
| fr-COO             | Number of carboxylic acids                                                   |
| fr-COO2            | Number of carboxylic acids                                                   |
| fr-C-O             | Number of carbonyl                                                           |
| fr-C-O-noCOO       | Number of carbonyl, excluding COOH                                           |
| fr-C-S             | Number of thiocarbonyl                                                       |
| fr-HOCCN           | Number of C(OH)CCN-Ctert-alkyl or C(OH)CCNcyclic                             |
| fr-Imine           | Number of Imines                                                             |
| fr-NH0             | Number of tertiary amines                                                    |
| fr-NH1             | Number of secondary amines                                                   |
| fr-NH2             | Number of primary amines                                                     |
| fr-N-O             | Number of hydroxylamine groups                                               |
| fr-Ndealkylation1  | Number of XCCNR groups                                                       |
| fr-Ndealkylation2  | Number of tert-alicyclic amines (no heteroatoms, not quinine-like bridged N) |
| fr-Nhpyrrole       | Number of H-pyrrole nitrogens                                                |
| fr-SH              | Number of thiol groups                                                       |
| fr-aldehyde        | Number of aldehydes                                                          |
| fr-alkyl-carbamate | Number of alkyl carbamates                                                   |
| fr-alkyl-halide    | Number of alkyl halides                                                      |
| fr-allylic-oxid    | Number of allylic oxidation sites excluding steroid dienone                  |
| fr-amide           | Number of amides                                                             |
| fr-amidine         | Number of amidine groups                                                     |
| fr-aniline         | Number of anilines                                                           |
| fr-aryl-methyl     | Number of aryl methyl sites for hydroxylation                                |
| fr-azide           | Number of azide groups                                                       |
| fr-azo             | Number of azo groups                                                         |
| fr-barbitur        | Number of barbiturate groups                                                 |
| fr-benzene         | Number of benzene rings                                                      |
| fr-benzodiazepine  | Number of benzodiazepines with no additional fused rings                     |
| fr-bicyclic        | Number of bicyclic rings                                                     |
| fr-diazo           | Number of diazo groups                                                       |
| fr-dihydropyridine | Number of dihydropyridines                                                   |
| fr-epoxide         | Number of epoxide rings                                                      |
| fr-ester           | Number of esters                                                             |
| fr-ether           | Number of ether oxygens                                                      |
| fr-furan           | Number of furan rings                                                        |
| fr-guanido         | Number of guanidine groups                                                   |
| fr-halogen         | Number of halogens                                                           |

|                        |                                                                                   |
|------------------------|-----------------------------------------------------------------------------------|
| fr-hdrzine             | Number of hydrazine groups                                                        |
| fr-hdrzone             | Number of hydrazone groups                                                        |
| fr-imidazole           | Number of imidazole rings                                                         |
| fr-imide               | Number of imide groups                                                            |
| fr-isocyan             | Number of isocyanates                                                             |
| fr-isothiocyan         | Number of isothiocyanates                                                         |
| fr-ketone              | Number of ketones                                                                 |
| fr-ketone-Topliss      | Number of ketones excluding diaryl, a,b-unsat.                                    |
| fr-lactam              | Number of beta lactams                                                            |
| fr-lactone             | Number of cyclic esters (lactones)                                                |
| fr-methoxy             | Number of methoxy groups                                                          |
| fr-morpholine          | Number of morpholine rings                                                        |
| fr-nitrile             | Number of nitriles                                                                |
| fr-nitro               | Number of nitro groups                                                            |
| fr-nitro-arom          | Number of nitro benzene ring substituents                                         |
| fr-nitro-arom-nonortho | Number of non-ortho nitro benzene ring substituents                               |
| fr-nitroso             | Number of nitroso groups, excluding NO2                                           |
| fr-oxazole             | Number of oxazole rings                                                           |
| fr-oxime               | Number of oxime groups                                                            |
| fr-para-hydroxylation  | Number of para-hydroxylation sites                                                |
| fr-phenol              | Number of phenols                                                                 |
| fr-phenol-noOrthoHbond | Number of phenolic OH excluding ortho intramolecular Hbond substituents           |
| fr-phos-acid           | Number of phosphoric acid groups                                                  |
| fr-phos-ester          | Number of phosphoric ester groups                                                 |
| fr-piperdine           | Number of piperdine rings                                                         |
| fr-piperzine           | Number of piperzine rings                                                         |
| fr-priamide            | Number of primary amides                                                          |
| fr-prisulfonamd        | Number of primary sulfonamides                                                    |
| fr-pyridine            | Number of pyridine rings                                                          |
| fr-quatN               | Number of quarternary nitrogens                                                   |
| fr-sulfide             | Number of thioether                                                               |
| fr-sulfonamd           | Number of sulfonamides                                                            |
| fr-sulfone             | Number of sulfone groups                                                          |
| fr-term-acetylene      | Number of terminal acetylenes                                                     |
| fr-tetrazole           | Number of tetrazole rings                                                         |
| fr-thiazole            | Number of thiazole rings                                                          |
| fr-thiocyan            | Number of thiocyanates                                                            |
| fr-thiophene           | Number of thiophene rings                                                         |
| fr-unbrch-alkane       | Number of unbranched alkanes of at least 4 members (excludes halogenated alkanes) |
| fr-urea                | Number of urea groups                                                             |

<https://www.rdkit.org/docs/GettingStartedInPython.html#rinker2>



**Table S3a** Performance results of binary classifiers with default hyperparameters. Models built on a training set of 300 observations  $\times$  200 variables under stratified 10-fold cross-validation and a logBB cut-off at 0.1 (logBB>0.1/class 1 or logBB $\leq$ 0.1/class 0) leading to 2 classes of 111 and 189 observations.

| Model  | Parameters | Variables | Accuracy          | Prec. | Recall | $F_1$ | MCC  | $\kappa$ | ROC AUC |
|--------|------------|-----------|-------------------|-------|--------|-------|------|----------|---------|
| LOGREG | default    | 200       | $0.810 \pm 0.059$ | 0.81  | 0.81   | 0.81  | 0.58 | 0.58     | 0.78    |
| CART   | default    | 200       | $0.734 \pm 0.066$ | 0.74  | 0.73   | 0.73  | 0.43 | 0.43     | 0.72    |
| RFC    | default    | 200       | $0.807 \pm 0.076$ | 0.81  | 0.81   | 0.80  | 0.58 | 0.57     | 0.77    |
| GBC    | default    | 200       | $0.764 \pm 0.077$ | 0.76  | 0.76   | 0.76  | 0.48 | 0.48     | 0.73    |
| KNN    | default    | 200       | $0.781 \pm 0.095$ | 0.78  | 0.78   | 0.78  | 0.53 | 0.53     | 0.77    |
| LDA    | default    | 200       | $0.700 \pm 0.065$ | 0.71  | 0.70   | 0.70  | 0.38 | 0.38     | 0.69    |
| QDA    | default    | 200       | $0.624 \pm 0.027$ | 0.55  | 0.62   | 0.51  | 0.01 | 0.01     | 0.50    |
| NB     | default    | 200       | $0.589 \pm 0.088$ | 0.73  | 0.59   | 0.58  | 0.33 | 0.26     | 0.66    |
| SVC    | default    | 200       | $0.630 \pm 0.007$ | 0.75  | 0.75   | 0.75  | 0.46 | 0.46     | 0.73    |

**Table S3b** Performance results of binary classifiers with default hyperparameters. Models evaluated against an external testing set of 32 observations  $\times$  200 variables under stratified 10-fold cross-validation.

| Model  | Parameters | Variables | Accuracy          | Prec. | Recall | $F_1$ | MCC  | $\kappa$ | ROC AUC |
|--------|------------|-----------|-------------------|-------|--------|-------|------|----------|---------|
| LOGREG | default    | 200       | $0.675 \pm 0.195$ | 0.66  | 0.66   | 0.65  | 0.33 | 0.31     | 0.66    |
| CART   | default    | 200       | $0.725 \pm 0.208$ | 0.73  | 0.72   | 0.72  | 0.45 | 0.44     | 0.72    |
| RFC    | default    | 200       | $0.800 \pm 0.218$ | 0.78  | 0.78   | 0.78  | 0.56 | 0.56     | 0.78    |
| GBC    | default    | 200       | $0.725 \pm 0.236$ | 0.72  | 0.72   | 0.72  | 0.44 | 0.44     | 0.72    |
| KNN    | default    | 200       | $0.625 \pm 0.279$ | 0.63  | 0.62   | 0.62  | 0.25 | 0.25     | 0.63    |
| LDA    | default    | 200       | $0.650 \pm 0.229$ | 0.62  | 0.62   | 0.62  | 0.25 | 0.25     | 0.63    |
| QDA    | default    | 200       | $0.600 \pm 0.200$ | 0.59  | 0.59   | 0.59  | 0.19 | 0.19     | 0.60    |
| NB     | default    | 200       | $0.525 \pm 0.175$ | 0.53  | 0.53   | 0.53  | 0.06 | 0.06     | 0.53    |
| SVC    | default    | 200       | $0.675 \pm 0.195$ | 0.67  | 0.66   | 0.65  | 0.33 | 0.31     | 0.65    |

Models: LOGREG: logistic regression, CART: decision tree, RFC: random forest classifier, GBC: gradient boosting classifier, KNN: k-nearest neighbors, LDA: linear discriminant analysis, QDA: quadratic discriminant analysis, NB: naïve Bayes and SVC: support vector classifier. Metrics: Prec.:precision,  $F_1$ : harmonic average of the precision and the recall MCC: Matthews correlation coefficient,  $\kappa$ : Cohen’s kappa score, ROC AUC: Receiver operating characteristic area under curve.

**Table S3c** Performance results of binary classifiers with default hyperparameters. Models built on a training set of 300 observations  $\times$  161 variables under stratified 10-fold cross-validation and a logBB cut-off at 0.1 (logBB>0.1/class 1 or logBB $\leq$ 0.1/class 0) leading to 2 classes of 111 and 189 observations.

| Model  | Parameters | Variables | Accuracy          | Prec. | Recall | $F_1$ | MCC  | $\kappa$ | ROC AUC |
|--------|------------|-----------|-------------------|-------|--------|-------|------|----------|---------|
| LOGREG | default    | 161       | $0.809 \pm 0.052$ | 0.81  | 0.81   | 0.81  | 0.58 | 0.58     | 0.78    |
| CART   | default    | 161       | $0.707 \pm 0.061$ | 0.71  | 0.71   | 0.71  | 0.37 | 0.37     | 0.68    |
| RFC    | default    | 161       | $0.794 \pm 0.075$ | 0.79  | 0.79   | 0.79  | 0.54 | 0.53     | 0.75    |
| GBC    | default    | 161       | $0.774 \pm 0.084$ | 0.77  | 0.77   | 0.77  | 0.51 | 0.51     | 0.75    |
| KNN    | default    | 161       | $0.764 \pm 0.104$ | 0.76  | 0.76   | 0.76  | 0.49 | 0.49     | 0.75    |
| LDA    | default    | 161       | $0.747 \pm 0.063$ | 0.76  | 0.75   | 0.75  | 0.48 | 0.47     | 0.74    |
| QDA    | default    | 161       | $0.617 \pm 0.049$ | 0.55  | 0.62   | 0.52  | 0.02 | 0.01     | 0.50    |
| NB     | default    | 161       | $0.559 \pm 0.084$ | 0.72  | 0.56   | 0.54  | 0.30 | 0.22     | 0.63    |
| SVC    | default    | 161       | $0.630 \pm 0.007$ | 0.40  | 0.63   | 0.49  | 0.00 | 0.00     | 0.50    |

**Table S3d** Performance results of binary classifiers with default hyperparameters. Models evaluated against an external testing set of 32 observations  $\times$  161 variables under stratified 10-fold cross-validation.

| Model  | Parameters | Variables | Accuracy          | Prec. | Recall | $F_1$ | MCC  | $\kappa$ | ROC AUC |
|--------|------------|-----------|-------------------|-------|--------|-------|------|----------|---------|
| LOGREG | default    | 161       | $0.750 \pm 0.224$ | 0.72  | 0.72   | 0.72  | 0.44 | 0.44     | 0.72    |
| CART   | default    | 161       | $0.675 \pm 0.195$ | 0.66  | 0.66   | 0.66  | 0.31 | 0.31     | 0.66    |
| RFC    | default    | 161       | $0.800 \pm 0.218$ | 0.78  | 0.78   | 0.78  | 0.56 | 0.56     | 0.78    |
| GBC    | default    | 161       | $0.700 \pm 0.218$ | 0.69  | 0.69   | 0.69  | 0.38 | 0.37     | 0.69    |
| KNN    | default    | 161       | $0.600 \pm 0.300$ | 0.59  | 0.59   | 0.59  | 0.19 | 0.19     | 0.59    |
| LDA    | default    | 161       | $0.700 \pm 0.245$ | 0.69  | 0.69   | 0.69  | 0.38 | 0.38     | 0.69    |
| QDA    | default    | 161       | $0.575 \pm 0.225$ | 0.57  | 0.56   | 0.56  | 0.13 | 0.12     | 0.56    |
| NB     | default    | 161       | $0.550 \pm 0.150$ | 0.56  | 0.56   | 0.56  | 0.13 | 0.12     | 0.56    |
| SVC    | default    | 161       | $0.750 \pm 0.224$ | 0.72  | 0.72   | 0.72  | 0.44 | 0.44     | 0.72    |

Models: LOGREG: logistic regression, CART: decision tree, RFC: random forest classifier, GBC: gradient boosting classifier, KNN: k-nearest neighbors, LDA: linear discriminant analysis, QDA: quadratic discriminant analysis, NB: naïve Bayes and SVC: support vector classifier. Metrics: Prec.:precision,  $F_1$ : harmonic average of the precision and the recall MCC: Matthews correlation coefficient,  $\kappa$ : Cohen's kappa score, ROC AUC: Receiver operating characteristic area under curve.

**Table S3e** Performance results of artificial neural networks (ANN) binary classifiers on 50 epochs, ADAM optimizer and binary cross entropy. Models built on a training set of 300 observations  $\times$  161 variables under stratified 10-fold cross-validation and a logBB cut-off at 0.1 (logBB>0.1/class 1 or logBB $\leq$ 0.1/class 0) leading to 2 classes of 111 and 189 observations.

| Model | Parameters                                         | Variables | Accuracy          |
|-------|----------------------------------------------------|-----------|-------------------|
| ANN1  | 1 dense layer (100 units)                          | 161       | 0.783 $\pm$ 0.083 |
| ANN2  | 1 dense layer (80 units)                           | 161       | 0.790 $\pm$ 0.077 |
| ANN3  | 1 dense layer (40 units)                           | 161       | 0.823 $\pm$ 0.065 |
| ANN4  | 2 dense layers (80 and 40 units)                   | 161       | 0.773 $\pm$ 0.080 |
| ANN5  | 2 dense layers (80 and 40 units), 2 dropout layers | 161       | 0.793 $\pm$ 0.068 |

**Table S3f** Performance results of artificial neural networks (ANN) binary classifiers on 50 epochs, ADAM optimizer and binary cross entropy. Models evaluated against an external testing set of 32 observations  $\times$  161 variables under stratified 10-fold cross-validation.

| Model | Parameters                                         | Variables | Accuracy          |
|-------|----------------------------------------------------|-----------|-------------------|
| ANN1  | 1 dense layer (100 units)                          | 161       | 0.725 $\pm$ 0.207 |
| ANN2  | 1 dense layer (80 units)                           | 161       | 0.750 $\pm$ 0.223 |
| ANN3  | 1 dense layer (40 units)                           | 161       | 0.750 $\pm$ 0.207 |
| ANN4  | 2 dense layers (80 and 40 units)                   | 161       | 0.775 $\pm$ 0.207 |
| ANN5  | 2 dense layers (80 and 40 units), 2 dropout layers | 161       | 0.775 $\pm$ 0.207 |

**Table S4a** Performance results of binary classifiers after recursive feature elimination with cross-validation (RFECV) and model hyperparameters tuning. Models were built on a training set of 300 observations  $\times$  200 variables under stratified 10-fold cross-validation and a logBB cut-off at 0.1 (logBB>0.1/class 1 or logBB $\leq$ 0.1/class 0).

| Model                                  | Parameters       | Variables | Accuracy          | Prec. | Recall | $F_1$ | MCC  | $\kappa$ | ROC AUC |
|----------------------------------------|------------------|-----------|-------------------|-------|--------|-------|------|----------|---------|
| After RFECV                            |                  |           |                   |       |        |       |      |          |         |
| LOGREG                                 | default          | 135       | 0.820             | 0.82  | 0.82   | 0.82  | 0.61 | 0.61     | 0.80    |
| CART                                   | default          | 200       | 0.747             | 0.75  | 0.75   | 0.75  | 0.46 | 0.46     | 0.73    |
| RFC                                    | default          | 154       | 0.817             | 0.80  | 0.80   | 0.80  | 0.57 | 0.56     | 0.77    |
| GBC                                    | default          | 160       | 0.777             | 0.77  | 0.78   | 0.77  | 0.51 | 0.51     | 0.75    |
| LDA                                    | default          | 31        | 0.807             | 0.84  | 0.83   | 0.83  | 0.65 | 0.65     | 0.83    |
| After tuning hyperparameters           |                  |           |                   |       |        |       |      |          |         |
| LOGREG                                 | L1, 1            | 200       | 0.810 $\pm$ 0.059 | 0.80  | 0.80   | 0.80  | 0.59 | 0.59     | 0.79    |
| CART                                   | auto, 5, 1       | 200       | 0.697 $\pm$ 0.045 | 0.71  | 0.69   | 0.69  | 0.41 | 0.39     | 0.68    |
| RFC                                    | sqrt, 400, 5, 2  | 200       | 0.800 $\pm$ 0.066 | 0.80  | 0.80   | 0.80  | 0.56 | 0.56     | 0.78    |
| GBC                                    | log2, 200, 10, 4 | 200       | 0.784 $\pm$ 0.068 | 0.76  | 0.76   | 0.76  | 0.52 | 0.52     | 0.76    |
| LDA                                    | 0.01, svd        | 200       | 0.723 $\pm$ 0.069 | 0.73  | 0.71   | 0.71  | 0.43 | 0.43     | 0.69    |
| After tuning hyperparameters and RFECV |                  |           |                   |       |        |       |      |          |         |
| LOGREG                                 | L1, 1            | 18        | 0.817             | 0.82  | 0.82   | 0.82  | 0.61 | 0.61     | 0.79    |
| CART                                   | auto, 5, 1       | 156       | 0.767             | 0.76  | 0.75   | 0.75  | 0.48 | 0.48     | 0.74    |
| RFC                                    | sqrt, 400, 5, 2  | 150       | 0.817             | 0.81  | 0.81   | 0.80  | 0.57 | 0.57     | 0.77    |
| GBC                                    | log2, 200, 10, 4 | 162       | 0.817             | 0.80  | 0.80   | 0.80  | 0.57 | 0.57     | 0.78    |

Models: LOGREG: logistic regression {parameters in order: penalty, cost C}, CART: decision tree {max\_features, max\_depth, min\_samples\_leaf}, RFC: random forest classifier {max\_features, n\_estimators, max\_depth, min\_samples\_leaf}, GBC: gradient boosting classifier {max\_features, n\_estimators, max\_depth, min\_samples\_leaf}, LDA: linear discriminant analysis {tol value, solver}. Metrics: Prec.: precision,  $F_1$ : harmonic average of the precision and the recall MCC: Matthews correlation coefficient,  $\kappa$ : Cohen's kappa score, ROC AUC: Receiver operating characteristic area under curve.

**Table S4b** Performance results of binary classifiers after RFECV and hyperparameters tuning. Models evaluated against an external testing set of 32 observations under stratified 10-fold cross-validation.

| Model                                  | Parameters       | Variables | Accuracy          | Prec. | Recall | $F_1$ | MCC   | $\kappa$ | ROC AUC |
|----------------------------------------|------------------|-----------|-------------------|-------|--------|-------|-------|----------|---------|
| After RFECV                            |                  |           |                   |       |        |       |       |          |         |
| LOGREG                                 | default          | 135       | 0.656             | 0.66  | 0.66   | 0.65  | 0.32  | 0.31     | 0.66    |
| CART                                   | default          | 200       | 0.688             | 0.69  | 0.69   | 0.69  | 0.38  | 0.38     | 0.69    |
| RFC                                    | default          | 154       | 0.781             | 0.78  | 0.78   | 0.78  | 0.57  | 0.56     | 0.77    |
| GBC                                    | default          | 160       | 0.719             | 0.72  | 0.72   | 0.72  | 0.44  | 0.44     | 0.72    |
| LDA                                    | default          | 31        | 0.469             | 0.47  | 0.47   | 0.47  | -0.06 | -0.06    | 0.47    |
| After tuning hyperparameters           |                  |           |                   |       |        |       |       |          |         |
| LOGREG                                 | L1, 1            | 200       | $0.625 \pm 0.182$ | 0.67  | 0.62   | 0.60  | 0.29  | 0.25     | 0.63    |
| CART                                   | auto, 5, 1       | 200       | $0.563 \pm 0.201$ | 0.57  | 0.56   | 0.56  | 0.13  | 0.13     | 0.56    |
| RFC                                    | sqrt, 400, 5, 2  | 200       | $0.750 \pm 0.200$ | 0.75  | 0.75   | 0.75  | 0.50  | 0.50     | 0.75    |
| GBC                                    | log2, 200, 10, 4 | 200       | $0.688 \pm 0.203$ | 0.69  | 0.69   | 0.69  | 0.38  | 0.38     | 0.69    |
| LDA                                    | 0.01, svd        | 200       | $0.625 \pm 0.231$ | 0.67  | 0.62   | 0.60  | 0.29  | 0.25     | 0.63    |
| After tuning hyperparameters and RFECV |                  |           |                   |       |        |       |       |          |         |
| LOGREG                                 | L1, 1            | 18        | 0.625             | 0.67  | 0.62   | 0.60  | 0.29  | 0.25     | 0.63    |
| CART                                   | auto, 5, 1       | 156       | 0.625             | 0.63  | 0.62   | 0.62  | 0.25  | 0.25     | 0.63    |
| RFC                                    | sqrt, 400, 5, 2  | 150       | 0.720             | 0.73  | 0.72   | 0.72  | 0.45  | 0.44     | 0.77    |
| GBC                                    | log2, 200, 10, 4 | 162       | 0.750             | 0.75  | 0.75   | 0.75  | 0.50  | 0.50     | 0.75    |

Models: LOGREG: logistic regression {parameters in order: penalty, cost C}, CART: decision tree {max\_features, max\_depth, min\_samples\_leaf}, RFC: random forest classifier {max\_features, n\_estimators, max\_depth, min\_samples\_leaf}, GBC: gradient boosting classifier {max\_features, n\_estimators, max\_depth, min\_samples\_leaf}, LDA: linear discriminant analysis {tol value, solver}. Metrics: Prec.: precision,  $F_1$ : harmonic average of the precision and the recall MCC: Matthews correlation coefficient,  $\kappa$ : Cohen's kappa score, ROC AUC: Receiver operating characteristic area under curve.

**Table S4c** Performance results of binary classifiers after recursive feature elimination with cross-validation (RFECV) and model hyperparameters tuning. Models built on a training set of 300 obs.  $\times$  161 var. under stratified 10-fold cross-validation and a logBB cut-off at 0.1 (logBB>0.1/class 1 or logBB $\leq$ 0.1/class 0) leading to 2 classes of 111 and 189 observations.

| Model                                  | Parameters       | Variables | Accuracy          | Prec. | Recall | $F_1$ | MCC  | $\kappa$ | ROC AUC |
|----------------------------------------|------------------|-----------|-------------------|-------|--------|-------|------|----------|---------|
| After RFECV                            |                  |           |                   |       |        |       |      |          |         |
| LOGREG                                 | default          | 88        | 0.824             | 0.82  | 0.82   | 0.82  | 0.61 | 0.61     | 0.79    |
| CART                                   | default          | 2         | 0.697             | 0.70  | 0.70   | 0.70  | 0.36 | 0.36     | 0.67    |
| RFC                                    | default          | 127       | 0.793             | 0.79  | 0.79   | 0.79  | 0.54 | 0.54     | 0.76    |
| GBC                                    | default          | 69        | 0.784             | 0.79  | 0.79   | 0.79  | 0.55 | 0.54     | 0.77    |
| LDA                                    | default          | 18        | 0.803             | 0.80  | 0.80   | 0.80  | 0.57 | 0.57     | 0.78    |
| After tuning hyperparameters           |                  |           |                   |       |        |       |      |          |         |
| LOGREG                                 | L2, 10           | 161       | 0.813 $\pm$ 0.060 | 0.81  | 0.81   | 0.81  | 0.60 | 0.60     | 0.80    |
| CART                                   | auto, 6, 1       | 161       | 0.739 $\pm$ 0.043 | 0.74  | 0.74   | 0.74  | 0.43 | 0.43     | 0.71    |
| RFC                                    | log2, 700, 5, 2  | 161       | 0.804 $\pm$ 0.066 | 0.81  | 0.80   | 0.79  | 0.57 | 0.55     | 0.76    |
| GBC                                    | log2, 300, 15, 4 | 161       | 0.804 $\pm$ 0.070 | 0.80  | 0.80   | 0.80  | 0.57 | 0.57     | 0.76    |
| LDA                                    | 0.0001, lsqr     | 161       | 0.754 $\pm$ 0.068 | 0.76  | 0.75   | 0.76  | 0.49 | 0.49     | 0.75    |
| After tuning hyperparameters and RFECV |                  |           |                   |       |        |       |      |          |         |
| LOGREG                                 | L2, 10           | 99        | 0.830             | 0.82  | 0.82   | 0.82  | 0.62 | 0.62     | 0.81    |
| CART                                   | auto, 6, 1       | 85        | 0.760             | 0.69  | 0.69   | 0.69  | 0.34 | 0.34     | 0.67    |
| RFC                                    | log2, 700, 5, 2  | 150       | 0.817             | 0.81  | 0.81   | 0.80  | 0.57 | 0.57     | 0.77    |
| GBC                                    | log2, 300, 15, 4 | 161       | 0.804             | 0.80  | 0.80   | 0.80  | 0.57 | 0.56     | 0.77    |

Models: LOGREG: logistic regression {parameters in order: penalty, cost C}, CART: decision tree {max\_features, max\_depth, min\_samples\_leaf}, RFC: random forest classifier {max\_features, n\_estimators, max\_depth, min\_samples\_leaf}, GBC: gradient boosting classifier {max\_features, n\_estimators, max\_depth, min\_samples\_leaf}, LDA: linear discriminant analysis {tol value, solver}. Metrics: Prec.: precision,  $F_1$ : harmonic average of the precision and the recall MCC: Matthews correlation coefficient,  $\kappa$ : Cohen's kappa score, ROC AUC: Receiver operating characteristic area under curve.

**Table S4d** Performance results of binary classifiers after RFECV and hyperparameters tuning. Models evaluated against an external testing set of 32 observations  $\times$  161 variables under stratified 10-fold cross-validation.

| Model                                  | Parameters       | Variables | Accuracy          | Prec. | Recall | $F_1$ | MCC  | $\kappa$ | ROC AUC |
|----------------------------------------|------------------|-----------|-------------------|-------|--------|-------|------|----------|---------|
| After RFECV                            |                  |           |                   |       |        |       |      |          |         |
| LOGREG                                 | default          | 88        | 0.656             | 0.66  | 0.66   | 0.65  | 0.32 | 0.31     | 0.66    |
| CART                                   | default          | 2         | 0.625             | 0.63  | 0.62   | 0.62  | 0.35 | 0.35     | 0.67    |
| RFC                                    | default          | 127       | 0.781             | 0.78  | 0.78   | 0.78  | 0.57 | 0.56     | 0.77    |
| GBC                                    | default          | 69        | 0.688             | 0.69  | 0.69   | 0.69  | 0.38 | 0.37     | 0.76    |
| LDA                                    | default          | 18        | 0.531             | 0.53  | 0.53   | 0.53  | 0.06 | 0.06     | 0.53    |
| After tuning hyperparameters           |                  |           |                   |       |        |       |      |          |         |
| LOGREG                                 | L2, 10           | 161       | $0.775 \pm 0.175$ | 0.75  | 0.75   | 0.75  | 0.50 | 0.50     | 0.75    |
| CART                                   | auto, 6, 1       | 161       | $0.600 \pm 0.200$ | 0.59  | 0.59   | 0.59  | 0.19 | 0.19     | 0.59    |
| RFC                                    | log2, 700, 5, 2  | 161       | $0.800 \pm 0.200$ | 0.78  | 0.78   | 0.78  | 0.56 | 0.56     | 0.78    |
| GBC                                    | log2, 300, 15, 4 | 161       | $0.800 \pm 0.200$ | 0.78  | 0.78   | 0.78  | 0.56 | 0.56     | 0.78    |
| LDA                                    | 0.0001, lsqr     | 161       | $0.550 \pm 0.245$ | 0.53  | 0.53   | 0.53  | 0.06 | 0.06     | 0.53    |
| After tuning hyperparameters and RFECV |                  |           |                   |       |        |       |      |          |         |
| LOGREG                                 | L2, 10           | 99        | 0.719             | 0.72  | 0.72   | 0.72  | 0.44 | 0.44     | 0.72    |
| CART                                   | auto, 6, 1       | 85        | 0.625             | 0.63  | 0.62   | 0.62  | 0.25 | 0.25     | 0.63    |
| RFC                                    | log2, 700, 5, 2  | 150       | 0.720             | 0.73  | 0.72   | 0.72  | 0.45 | 0.44     | 0.77    |
| GBC                                    | log2, 300, 15, 4 | 161       | 0.781             | 0.78  | 0.78   | 0.78  | 0.56 | 0.56     | 0.78    |

Models: LOGREG: logistic regression {parameters in order: penalty, cost C}, CART: decision tree {max\_features, max\_depth, min\_samples\_leaf}, RFC: random forest classifier {max\_features, n\_estimators, max\_depth, min\_samples\_leaf}, GBC: gradient boosting classifier {max\_features, n\_estimators, max\_depth, min\_samples\_leaf}, LDA: linear discriminant analysis {tol value, solver}. Metrics: Prec.:precision,  $F_1$ : harmonic average of the precision and the recall MCC: Matthews correlation coefficient,  $\kappa$ : Cohen's kappa score, ROC AUC: Receiver operating characteristic area under curve.

**Table S5** Classes and cut-offs were identified by applying k-means clustering upon logBB distribution and features from 332 observations.

| Nb. classes | logBB cut-off(s)           | class distribution     |
|-------------|----------------------------|------------------------|
| 2           | −0.3                       | 132 : 200              |
| 3           | −0.3 / 0.51                | 132 : 133 : 67         |
| 4           | −1.13 / −0.3 / 0.51        | 43 : 89 : 133 : 67     |
| 5           | −1.13 / −0.3 / 0.21 / 0.77 | 43 : 89 : 89 : 72 : 39 |



**Table S6a** Performance results of multi-class classifiers with default hyperparameters. Models built on a training set of 300 observations under stratified 10-fold cross-validation. LogBB cut-offs follow Table S5.

| Model     | Accuracy | Precision | Recall | <i>F1</i> score | Mcc  | Ck   | ROC AUC |
|-----------|----------|-----------|--------|-----------------|------|------|---------|
| 2 classes |          |           |        |                 |      |      |         |
| LOGREG    | 0.752    | 0.75      | 0.75   | 0.75            | 0.48 | 0.47 | 0.73    |
| CART      | 0.680    | 0.68      | 0.68   | 0.68            | 0.34 | 0.34 | 0.67    |
| RFC       | 0.745    | 0.74      | 0.74   | 0.74            | 0.46 | 0.46 | 0.73    |
| GBC       | 0.744    | 0.74      | 0.74   | 0.74            | 0.46 | 0.46 | 0.73    |
| KNN       | 0.658    | 0.65      | 0.66   | 0.65            | 0.27 | 0.27 | 0.63    |
| LDA       | 0.754    | 0.75      | 0.75   | 0.75            | 0.49 | 0.49 | 0.75    |
| QDA       | 0.583    | 0.53      | 0.58   | 0.58            | 0.02 | 0.01 | 0.50    |
| NB        | 0.704    | 0.70      | 0.70   | 0.70            | 0.38 | 0.38 | 0.69    |
| SVC       | 0.590    | 0.35      | 0.59   | 0.44            | 0.00 | 0.00 | 0.50    |
| 3 classes |          |           |        |                 |      |      |         |
| LOGREG*   | 0.627    | 0.63      | 0.63   | 0.63            | 0.40 | 0.40 |         |
| CART      | 0.542    | 0.55      | 0.54   | 0.54            | 0.28 | 0.28 |         |
| RFC       | 0.636    | 0.64      | 0.64   | 0.63            | 0.41 | 0.41 |         |
| GBC       | 0.622    | 0.62      | 0.62   | 0.62            | 0.40 | 0.40 |         |
| KNN       | 0.556    | 0.56      | 0.56   | 0.56            | 0.29 | 0.29 |         |
| LDA       | 0.594    | 0.60      | 0.59   | 0.60            | 0.37 | 0.37 |         |
| QDA       | 0.420    | 0.42      | 0.42   | 0.42            | 0.09 | 0.09 |         |
| NB        | 0.392    | 0.50      | 0.39   | 0.39            | 0.19 | 0.16 |         |
| SVC       | 0.423    | 0.39      | 0.42   | 0.28            | 0.06 | 0.02 |         |
| 4 classes |          |           |        |                 |      |      |         |
| LOGREG*   | 0.501    | 0.50      | 0.50   | 0.49            | 0.26 | 0.26 |         |
| CART      | 0.457    | 0.46      | 0.46   | 0.46            | 0.23 | 0.23 |         |
| RFC       | 0.526    | 0.53      | 0.53   | 0.50            | 0.30 | 0.29 |         |
| GBC       | 0.493    | 0.49      | 0.49   | 0.49            | 0.27 | 0.27 |         |
| KNN       | 0.456    | 0.45      | 0.46   | 0.45            | 0.23 | 0.23 |         |
| LDA       | 0.491    | 0.49      | 0.49   | 0.49            | 0.29 | 0.29 |         |
| QDA       | 0.346    | 0.42      | 0.44   | 0.43            | 0.06 | 0.05 |         |
| NB        | 0.329    | 0.46      | 0.33   | 0.28            | 0.20 | 0.16 |         |
| SVC       | 0.407    | 0.17      | 0.41   | 0.24            | 0.00 | 0.00 |         |
| 5 classes |          |           |        |                 |      |      |         |
| LOGREG*   | 0.402    | 0.40      | 0.40   | 0.39            | 0.21 | 0.20 |         |
| CART      | 0.372    | 0.37      | 0.37   | 0.37            | 0.19 | 0.19 |         |
| RFC       | 0.426    | 0.44      | 0.43   | 0.41            | 0.24 | 0.24 |         |
| GBC       | 0.419    | 0.42      | 0.42   | 0.42            | 0.24 | 0.24 |         |
| KNN       | 0.375    | 0.37      | 0.37   | 0.37            | 0.19 | 0.19 |         |
| LDA       | 0.400    | 0.40      | 0.39   | 0.39            | 0.22 | 0.22 |         |
| QDA       | 0.277    | 0.25      | 0.28   | 0.26            | 0.04 | 0.04 |         |
| NB        | 0.319    | 0.38      | 0.32   | 0.27            | 0.21 | 0.19 |         |
| SVC       | 0.280    | 0.08      | 0.28   | 0.12            | 0.00 | 0.00 |         |

\* For multiclass logistic regression, all four solvers (sag/saga or lbfgs or newton-cg) displayed the same results.

**Table S6b** Performance results of multi-class classifiers with default hyperparameters. Models evaluated against an external testing set of 32 observations under stratified 10-fold cross-validation.

| Model     | Accuracy | Precision | Recall | <i>F1</i> score | Mcc   | Ck    | ROC AUC |
|-----------|----------|-----------|--------|-----------------|-------|-------|---------|
| 2 classes |          |           |        |                 |       |       |         |
| LOGREG    | 0.700    | 0.51      | 0.69   | 0.59            | −0.11 | −0.05 | 0.48    |
| CART      | 0.600    | 0.61      | 0.59   | 0.60            | 0.03  | 0.03  | 0.52    |
| RFC       | 0.633    | 0.50      | 0.62   | 0.55            | −0.20 | 0.16  | 0.44    |
| GBC       | 0.600    | 0.61      | 0.59   | 0.60            | 0.03  | 0.03  | 0.52    |
| KNN       | 0.625    | 0.63      | 0.62   | 0.62            | 0.25  | 0.25  | 0.63    |
| LDA       | 0.792    | 0.77      | 0.78   | 0.78            | 0.44  | 0.44  | 0.72    |
| QDA       | 0.625    | 0.68      | 0.62   | 0.64            | 0.19  | 0.18  | 0.60    |
| NB        | 0.550    | 0.56      | 0.56   | 0.56            | −0.08 | −0.08 | 0.46    |
| SVC       | 0.725    | 0.52      | 0.72   | 0.60            | 0.00  | 0.00  | 0.50    |
| 3 classes |          |           |        |                 |       |       |         |
| LOGREG*   | 0.462    | 0.44      | 0.44   | 0.43            | 0.14  | 0.14  |         |
| CART      | 0.443    | 0.44      | 0.44   | 0.44            | 0.15  | 0.15  |         |
| RFC       | 0.320    | 0.28      | 0.31   | 0.29            | −0.05 | −0.05 |         |
| GBC       | 0.337    | 0.29      | 0.31   | 0.30            | −0.05 | −0.05 |         |
| KNN       | 0.423    | 0.28      | 0.41   | 0.33            | 0.15  | 0.13  |         |
| LDA       | 0.395    | 0.36      | 0.38   | 0.36            | 0.04  | 0.04  |         |
| QDA       | 0.273    | 0.28      | 0.28   | 0.27            | −0.07 | −0.07 |         |
| NB        | 0.382    | 0.36      | 0.38   | 0.36            | 0.04  | 0.04  |         |
| SVC       | 0.348    | 0.24      | 0.34   | 0.23            | −0.08 | −0.05 |         |
| 4 classes |          |           |        |                 |       |       |         |
| LOGREG*   | 0.435    | 0.28      | 0.38   | 0.31            | 0.03  | 0.03  |         |
| CART      | 0.310    | 0.26      | 0.28   | 0.27            | −0.03 | −0.03 |         |
| RFC       | 0.415    | 0.28      | 0.34   | 0.31            | 0.01  | 0.01  |         |
| GBC       | 0.355    | 0.28      | 0.34   | 0.31            | 0.02  | 0.02  |         |
| KNN       | 0.340    | 0.34      | 0.31   | 0.29            | 0.04  | 0.03  |         |
| LDA       | 0.415    | 0.32      | 0.34   | 0.32            | 0.04  | 0.04  |         |
| QDA       | 0.165    | 0.20      | 0.19   | 0.19            | −0.14 | −0.14 |         |
| NB        | 0.410    | 0.29      | 0.38   | 0.33            | 0.05  | 0.05  |         |
| SVC       | 0.385    | 0.22      | 0.34   | 0.23            | −0.07 | −0.04 |         |
| 5 classes |          |           |        |                 |       |       |         |
| LOGREG*   | 0.470    | 0.19      | 0.31   | 0.23            | 0.03  | 0.03  |         |
| CART      | 0.330    | 0.18      | 0.22   | 0.20            | −0.04 | 0.04  |         |
| RFC       | 0.470    | 0.23      | 0.31   | 0.27            | 0.07  | 0.07  |         |
| GBC       | 0.470    | 0.24      | 0.31   | 0.26            | 0.05  | 0.05  |         |
| KNN       | 0.420    | 0.18      | 0.28   | 0.21            | 0.05  | 0.05  |         |
| LDA       | 0.600    | 0.51      | 0.47   | 0.48            | 0.30  | 0.30  |         |
| QDA       | 0.060    | 0.08      | 0.09   | 0.08            | −0.17 | −0.17 |         |
| NB        | 0.490    | 0.33      | 0.34   | 0.32            | 0.13  | 0.13  |         |
| SVC       | 0.520    | 0.12      | 0.34   | 0.18            | 0.00  | 0.00  |         |

\* For multiclass logistic regression, all four solvers (sag/saga or lbfgs or newton-cg) displayed the same results.

**Table S7a** Performance results of regressors with default or optimized hyperparameters. Models built on a training set of 300 observations under 10-fold cross-validation.

| Model                                                             | Parameters       | Nb. Variables | $Q^2$ | MSE  | MAE  | EV    |
|-------------------------------------------------------------------|------------------|---------------|-------|------|------|-------|
| LINREG                                                            | default          | 200           | 0.08  | 0.66 | 0.58 | 0.11  |
| RIDGE                                                             | default          | 200           | 0.51  | 0.30 | 0.43 | 0.51  |
| LASSO                                                             | default          | 200           | −0.01 | 0.61 | 0.62 | −0.01 |
| ELASTIC                                                           | default          | 200           | −0.01 | 0.61 | 0.62 | −0.01 |
| LARS                                                              | default          | 200           | −0.01 | 0.61 | 0.62 | −0.01 |
| RFR                                                               | default          | 200           | 0.43  | 0.34 | 0.43 | 0.43  |
| GBR                                                               | default          | 200           | 0.47  | 0.32 | 0.43 | 0.47  |
| SVR                                                               | default          | 200           | 0.18  | 0.50 | 0.55 | 0.19  |
| BAYESRG                                                           | default          | 200           | 0.50  | 0.30 | 0.43 | 0.50  |
| After Recursive Feature Elimination with Cross-Validation (RFECV) |                  |               |       |      |      |       |
| RIDGE                                                             | default          | 150           | 0.51  | 0.29 | 0.41 | 0.52  |
| BAYESRG                                                           | default          | 126           | 0.50  | 0.30 | 0.43 | 0.51  |
| After tuning hyperparameters                                      |                  |               |       |      |      |       |
| RIDGE                                                             | 1, sparse_cg     | 200           | 0.52  | 0.28 | 0.41 | 0.52  |
| BAYESRG                                                           | 1e-6, 10, 10, 10 | 200           | 0.51  | 0.28 | 0.43 | 0.51  |
| After RFECV and tuning hyperparameters                            |                  |               |       |      |      |       |
| RIDGE                                                             | 1, sparse_cg     | 150           | 0.53  | 0.28 | 0.42 | 0.53  |
| BAYESRG                                                           | 1e-6, 10, 10, 10 | 126           | 0.54  | 0.28 | 0.41 | 0.54  |

Models: LINREG: ordinary least squares linear, RIDGE: ridge regression {alpha, solver}, LASSO: least absolute shrinkage and selection operator regression, ELASTIC: elastic net regression LARS: least-angle regression, RFR: random forest regression, GBR: gradient boosting regression, SVR: support vector regression, BAYESRG: Bayesian ridge regression {alpha1, alpha2, lambda1, lambda2}. Metrics:  $Q^2$ , MSE: mean square error, MAE: mean absolute error and EV: explained variance.

**Table S7b** Performance results of regressors with default or optimized hyperparameters. Models evaluated against an external testing set of 32 observations under 10-fold cross-validation.

| Model                                                             | Parameters       | Nb. Variables | $Q^2$ | MSE  | MAE  | EV    |
|-------------------------------------------------------------------|------------------|---------------|-------|------|------|-------|
| LINREG                                                            | default          | 200           | 0.21  | 0.57 | 0.58 | 0.21  |
| RIDGE                                                             | default          | 200           | 0.15  | 0.60 | 0.60 | 0.16  |
| LASSO                                                             | default          | 200           | −0.07 | 0.77 | 0.72 | −0.07 |
| ELASTIC                                                           | default          | 200           | −0.07 | 0.77 | 0.72 | −0.07 |
| LARS                                                              | default          | 200           | −0.07 | 0.77 | 0.72 | −0.07 |
| RFR                                                               | default          | 200           | −0.09 | 0.78 | 0.70 | −0.09 |
| GBR                                                               | default          | 200           | −0.37 | 0.98 | 0.83 | −0.36 |
| SVR                                                               | default          | 200           | −0.08 | 0.77 | 0.73 | −0.08 |
| BAYESRG                                                           | default          | 200           | 0.00  | 0.72 | 0.68 | 0.02  |
| After Recursive Feature Elimination with Cross-Validation (RFECV) |                  |               |       |      |      |       |
| RIDGE                                                             | default          | 150           | 0.15  | 0.60 | 0.60 | 0.16  |
| BAYESRG                                                           | default          | 126           | 0.00  | 0.72 | 0.68 | 0.02  |
| After tuning hyperparameters                                      |                  |               |       |      |      |       |
| RIDGE                                                             | 1, sparse_cg     | 200           | 0.16  | 0.60 | 0.59 | 0.16  |
| BAYESRG                                                           | 1e-6, 10, 10, 10 | 200           | 0.11  | 0.64 | 0.62 | 0.11  |
| After RFECV and tuning hyperparameters                            |                  |               |       |      |      |       |
| RIDGE                                                             | 1, sparse_cg     | 150           | 0.18  | 0.59 | 0.59 | 0.18  |
| BAYESRG                                                           | 1e-6, 10, 10, 10 | 126           | 0.13  | 0.62 | 0.62 | 0.13  |

Models: LINREG: ordinary least squares linear, RIDGE: ridge regression {alpha, solver}, LASSO: least absolute shrinkage and selection operator regression, ELASTIC: elastic net regression LARS: least-angle regression, RFR: random forest regression, GBR: gradient boosting regression, SVR: support vector regression, BAYESRG: Bayesian ridge regression {alpha1, alpha2, lambda1, lambda2}. Metrics:  $Q^2$ , MSE: mean square error, MAE: mean absolute error and EV: explained variance.

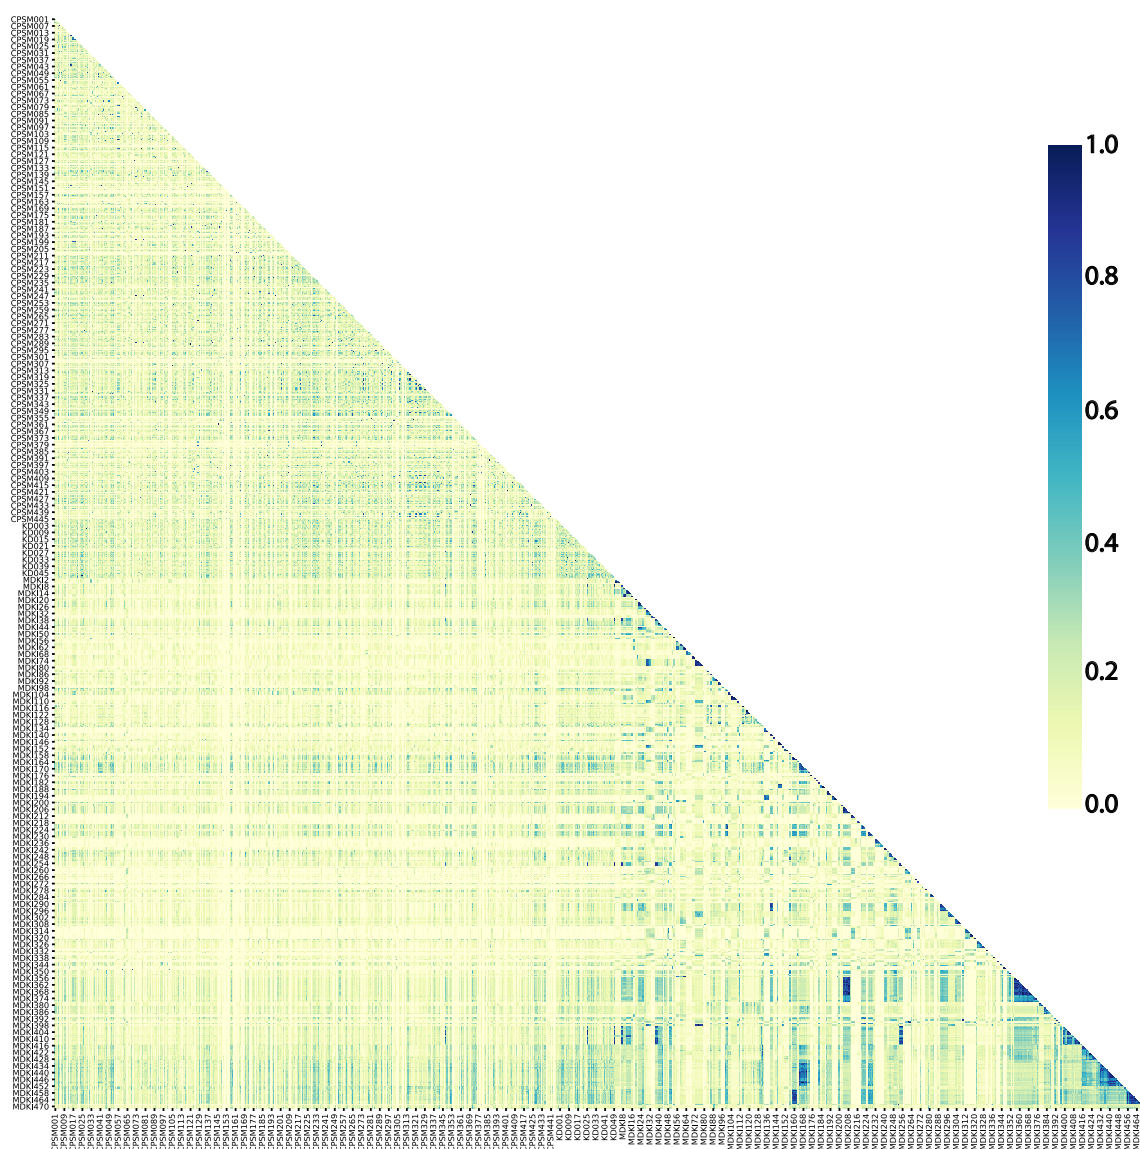

**Figure S1a.** Fingerprint similarity matrix using public MACCS structural keys between the 968 structures grouped as CNS-penetrant small molecules (CPSMs), kinase drugs (KDs) and marine-derived kinase inhibitors (MDKIs). The maximum similarity is observed at a value of 1.0 (dark blue).

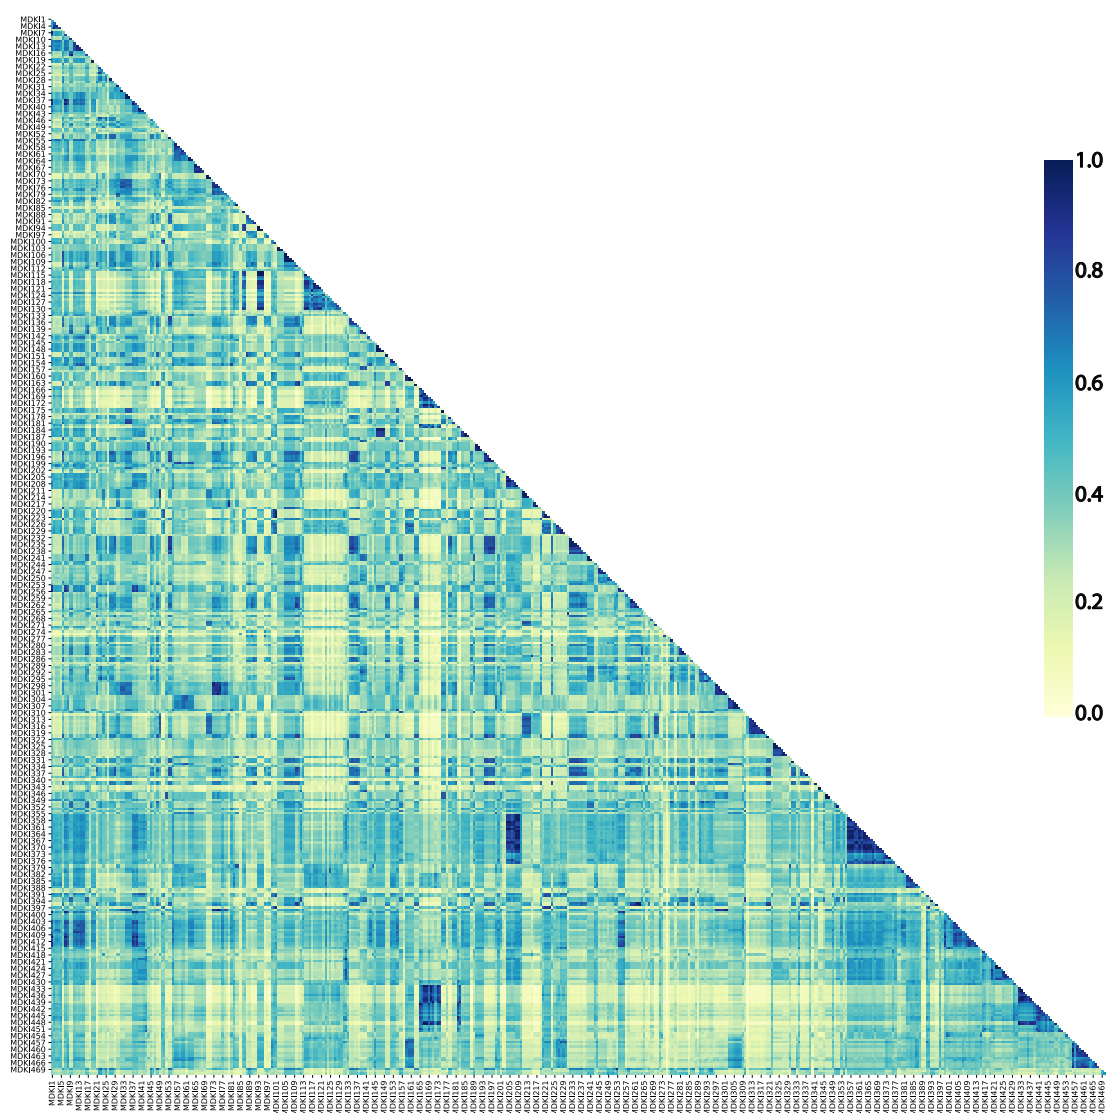

**Figure S1b.** Fingerprint similarity matrix using public MACCS structural keys of 471 marine-derived kinase inhibitors (MDKIs). The maximum similarity is observed at a value of 1.0 (dark blue).

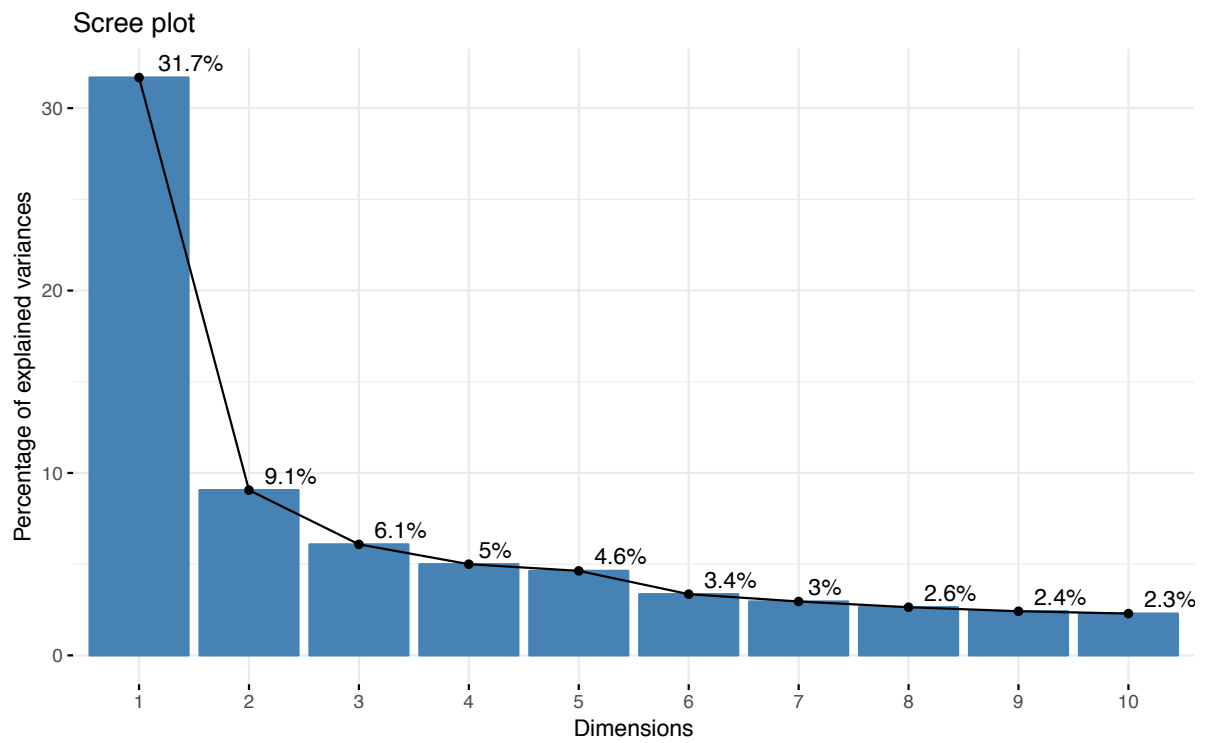

**Figure S2a.** Scree plot showing the first 10 principal components (dimensions) and the respective percentage of explained variance.





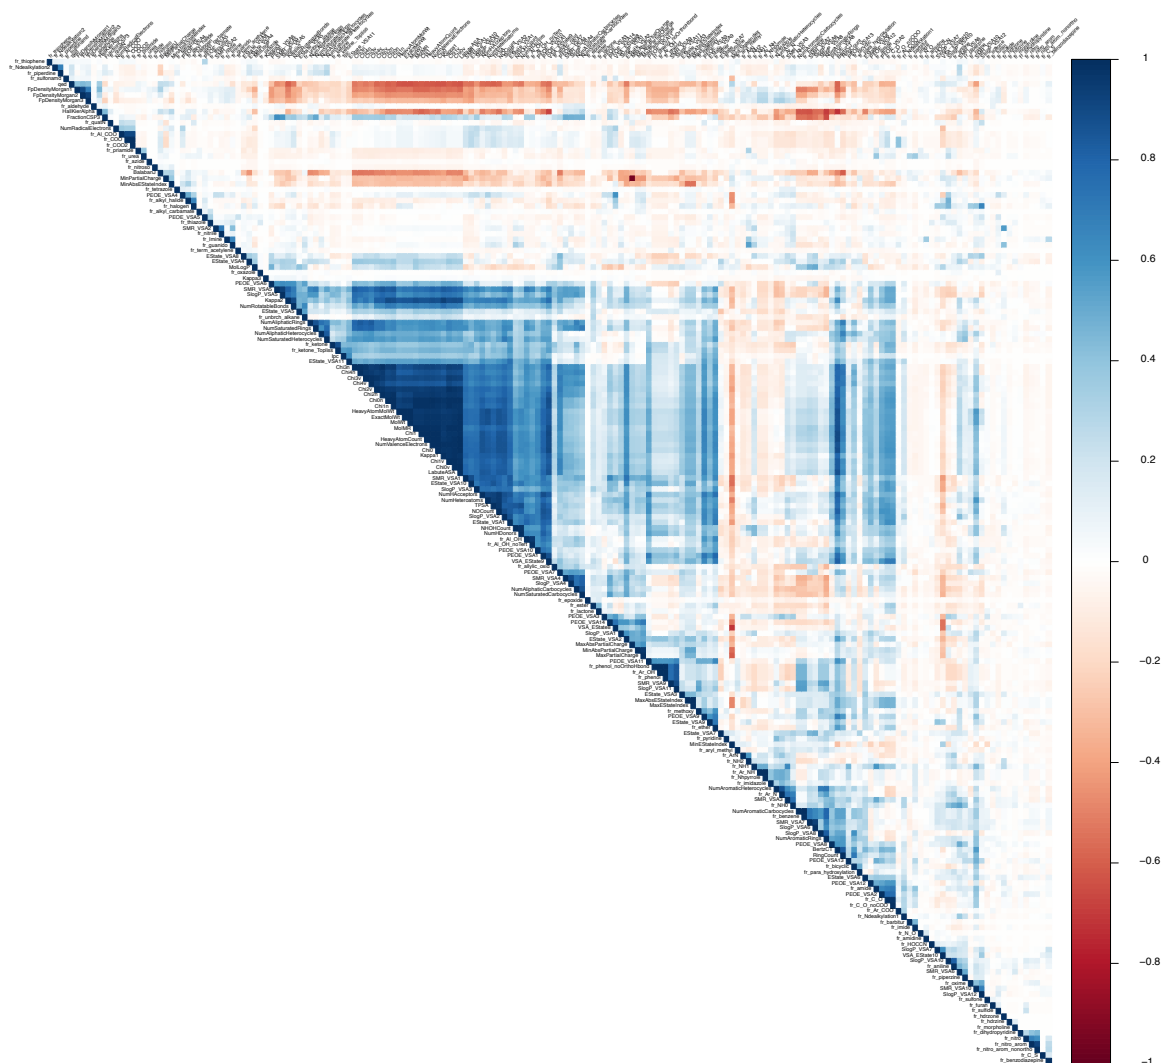

**Figure S3a.** Correlogram using Pearson rank showing linear correlations between the 181 variables (19 variables with no information).

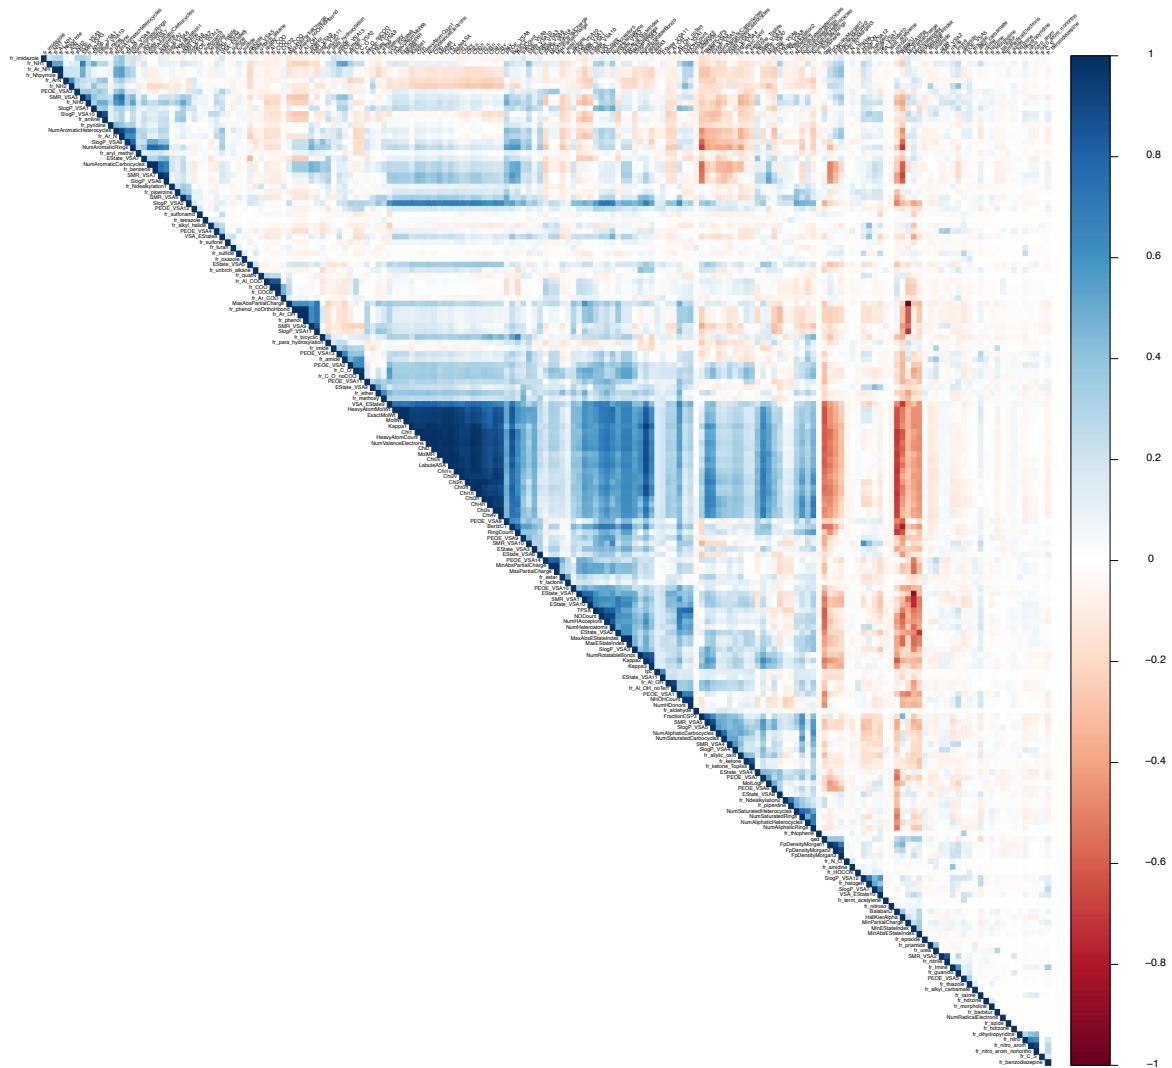

**Figure S3b.** Correlogram using Spearman rank showing non-linear correlations between the 181 variables (19 variables with no information).

### Variance Threshold applied to the entire dataset

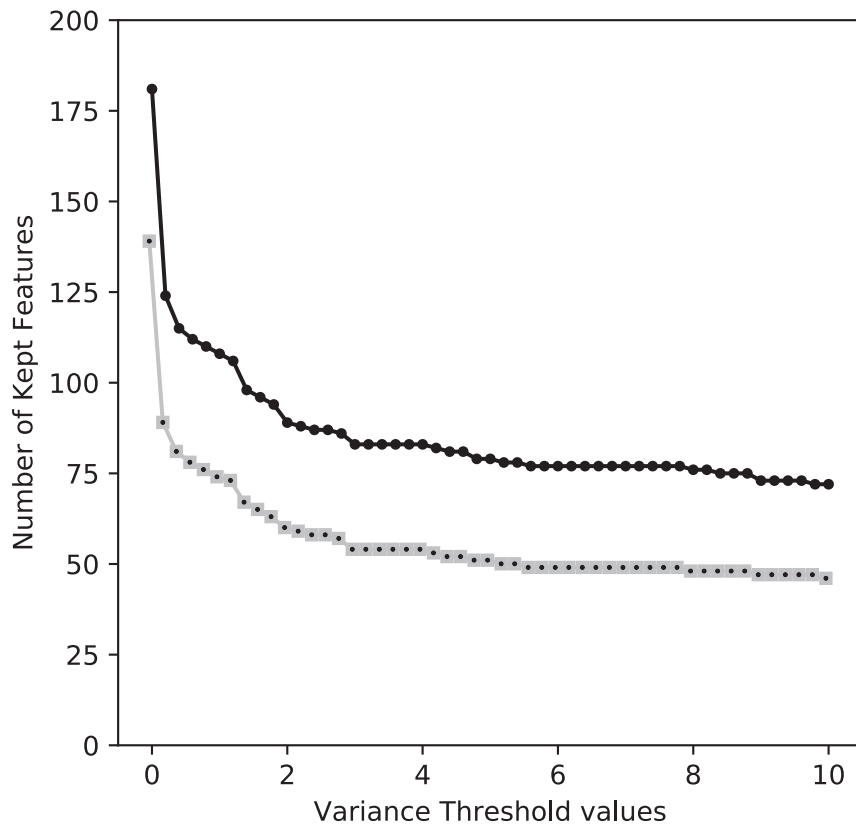

**Figure S4.** Scatterplot showing the reduction of kept variables with an increasing variance threshold for entire dataset (black - 200 variables) and reduced dataset (grey - 161 variables, 39 highly correlated variables were removed). In both cases, 19 variables have no information thus no variance to be shown.

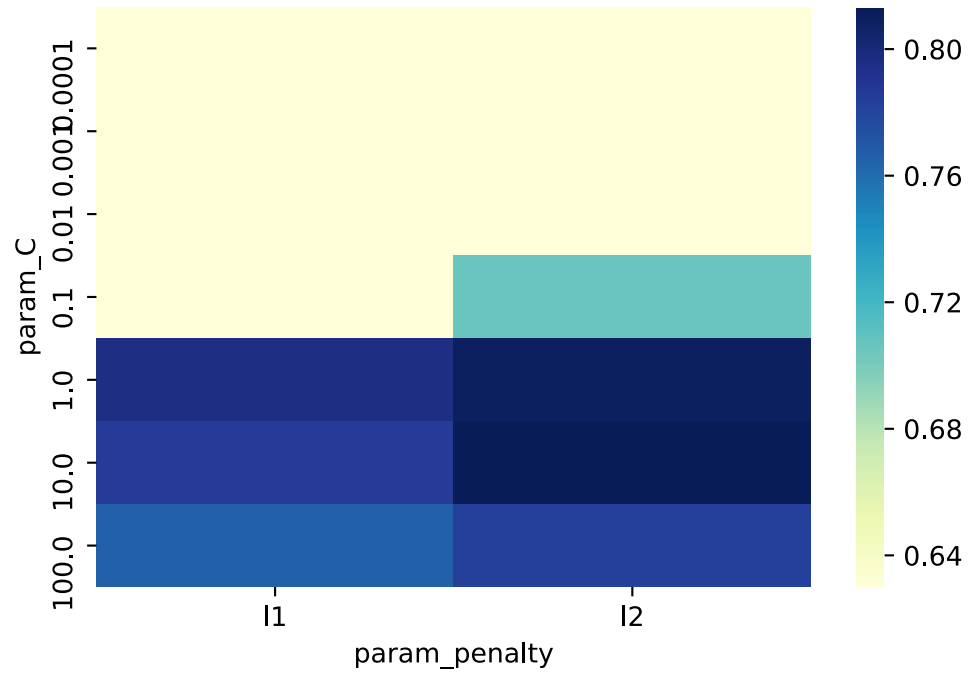

**Figure S5.** Hyperparameters tuning for logistic regression binary classifier

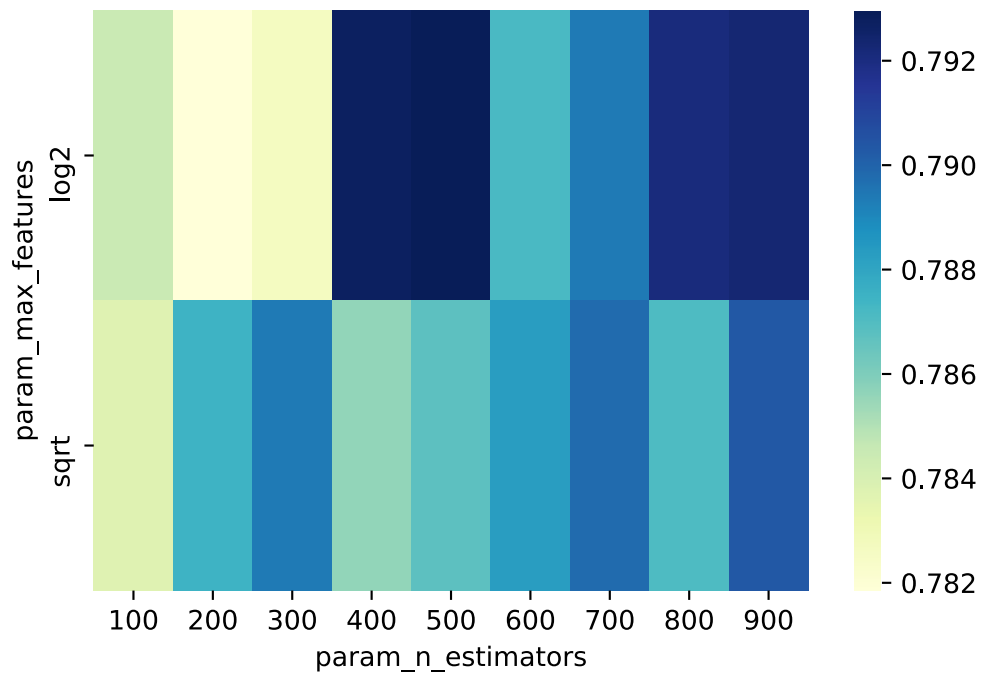

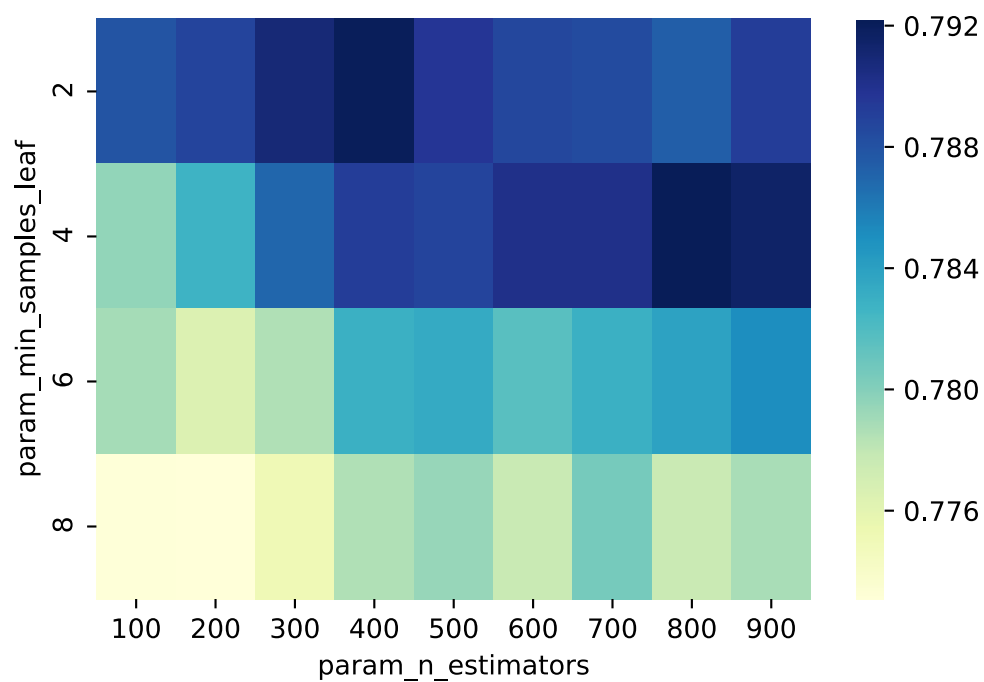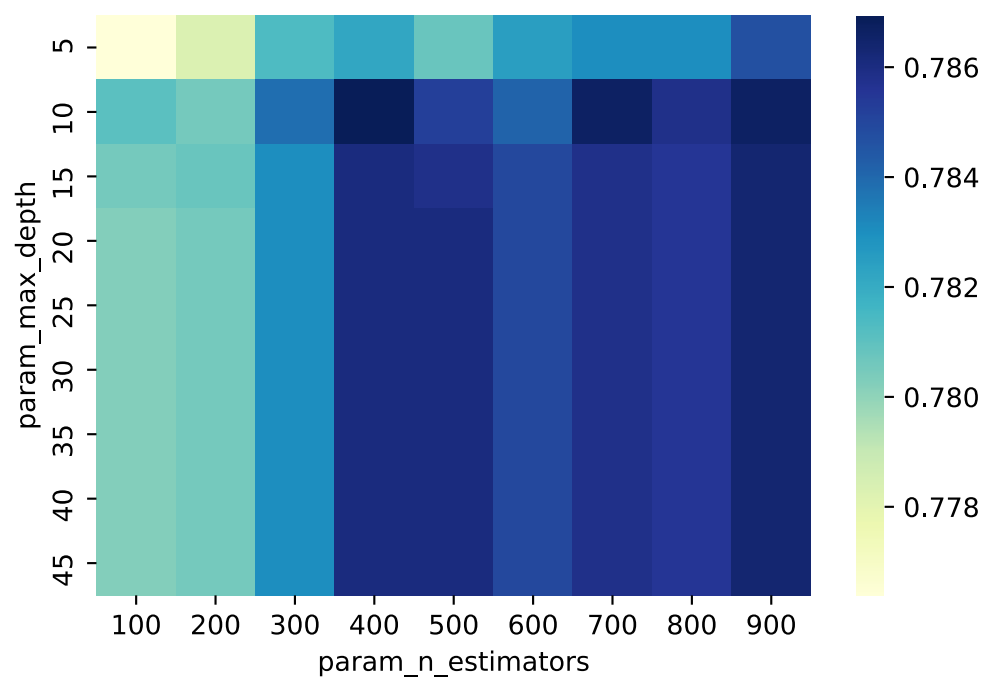

**Figure S6.** Hyperparameters tuning for random forest binary classifier

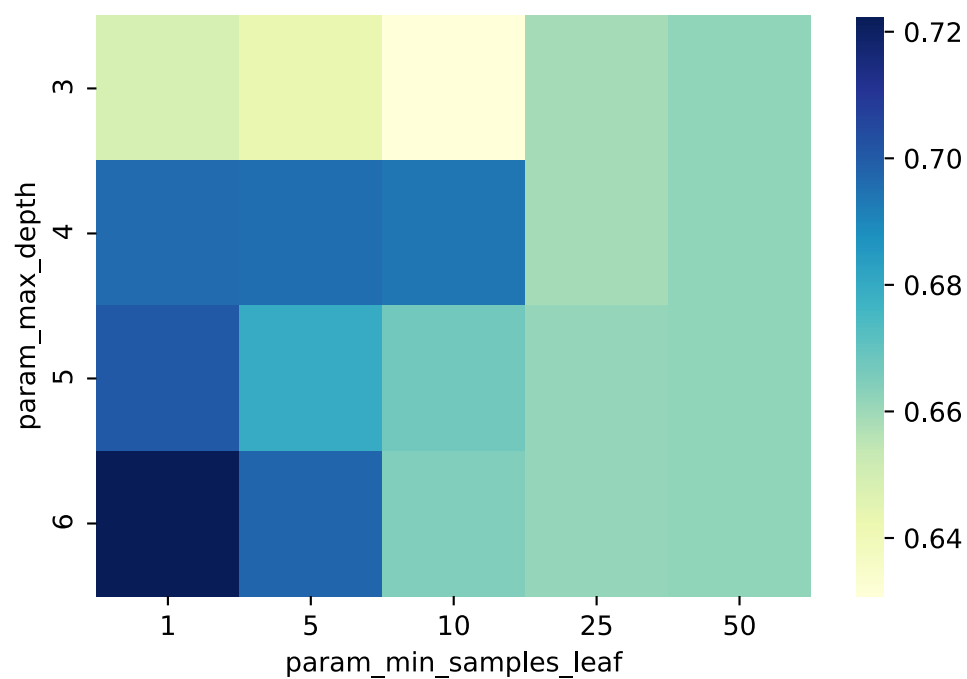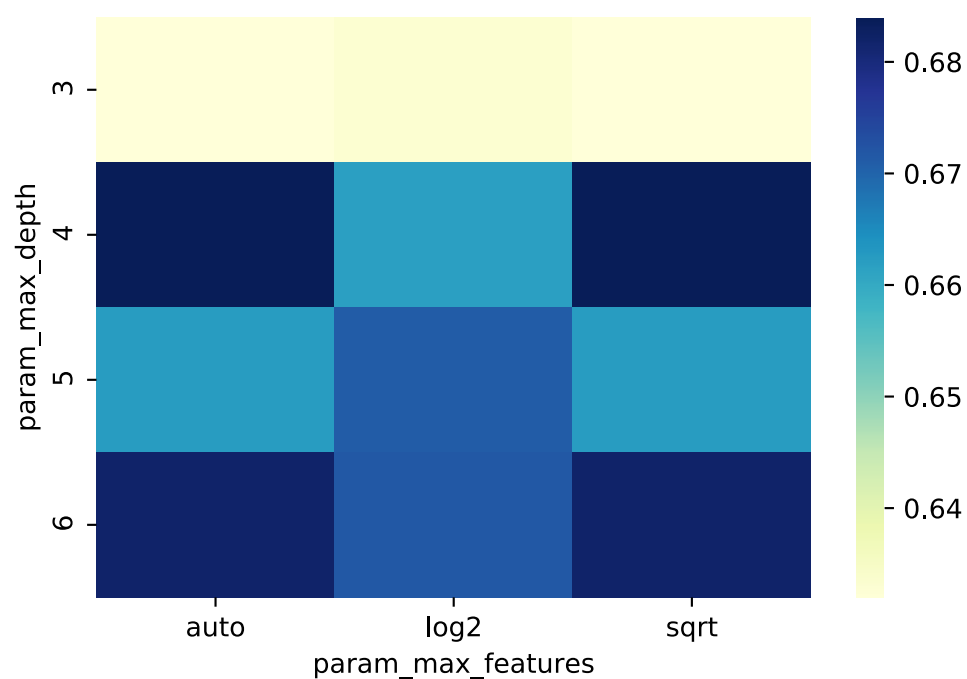

**Figure S7.** Hyperparameters tuning for decision tree binary classifier

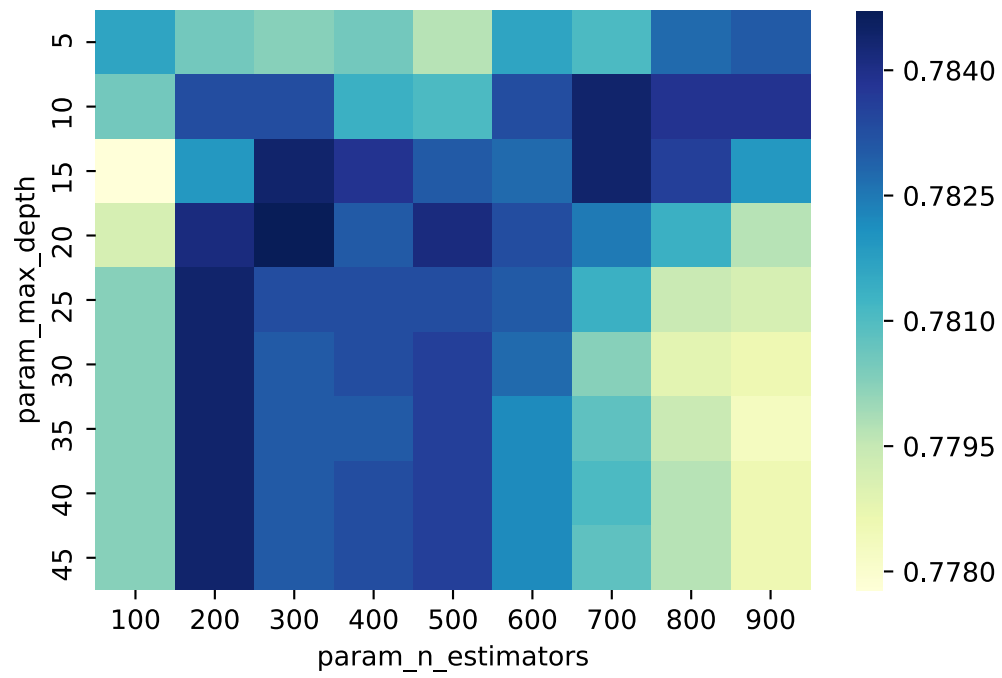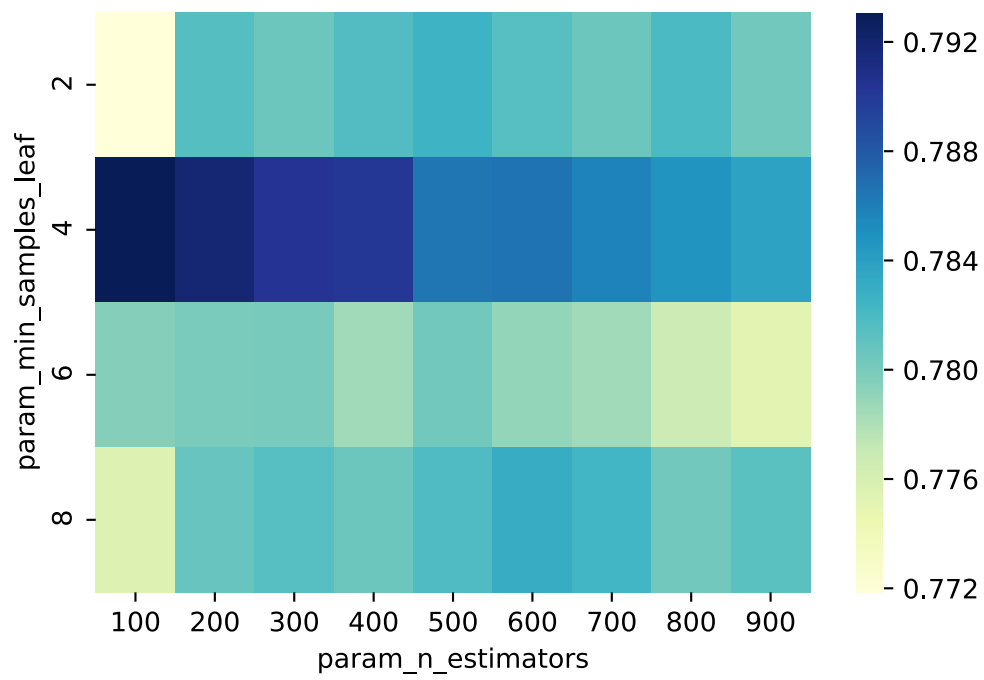

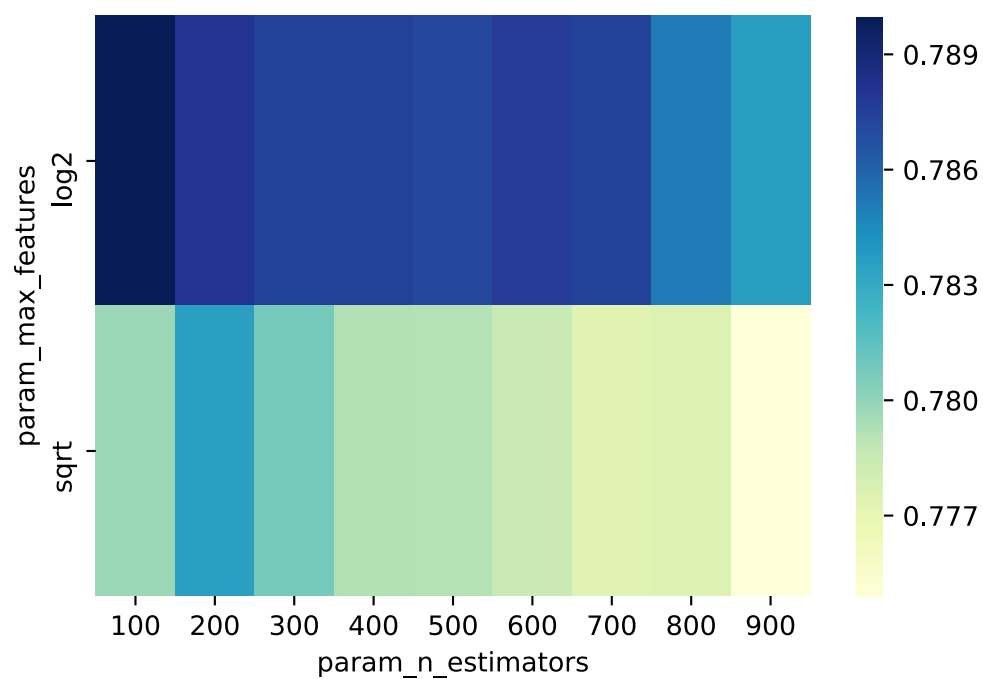

**Figure S8.** Hyperparameters tuning for gradient boosting binary classifier



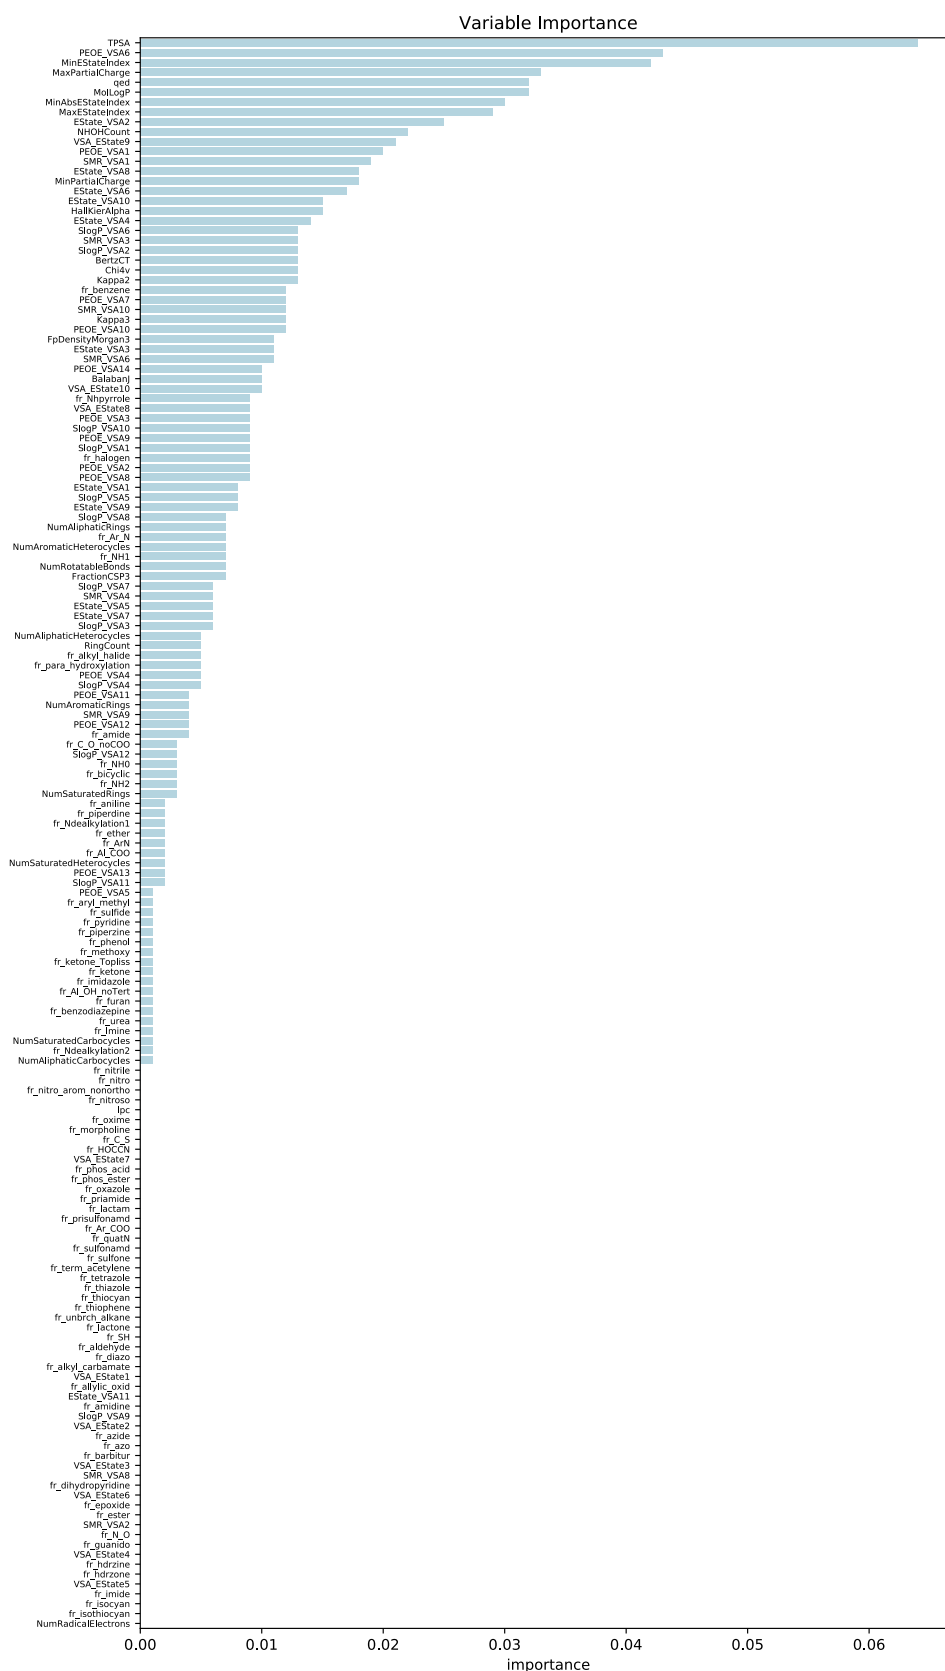

**Figure S9.** Variables importances for optimized random forest classifier.

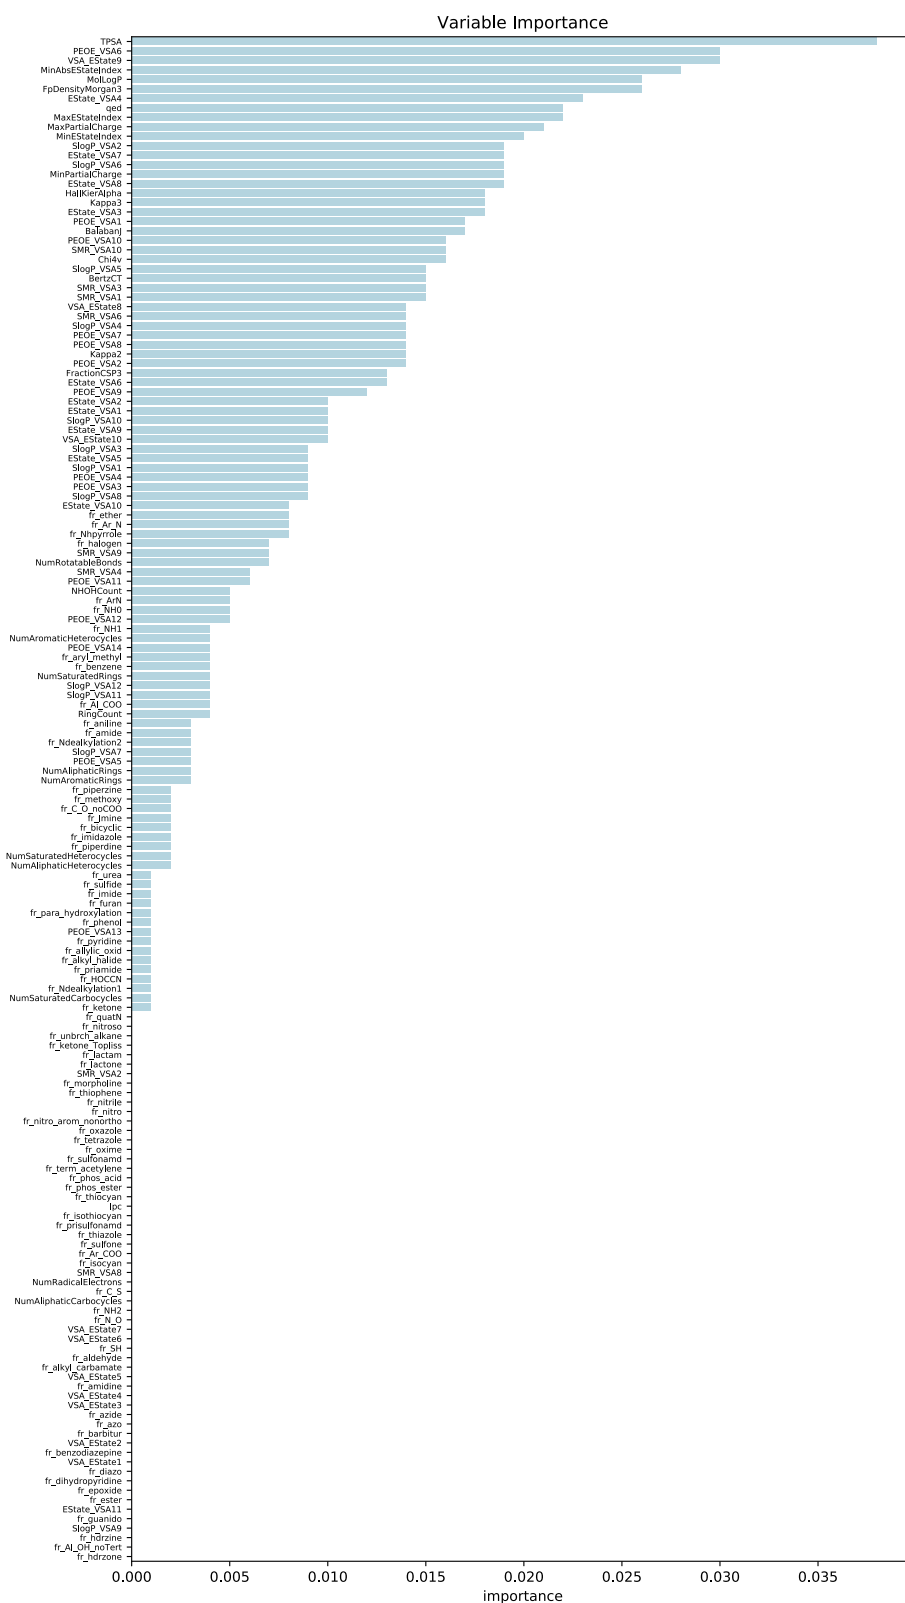

**Figure S10.** Variables importance for optimized gradient boosting classifier.

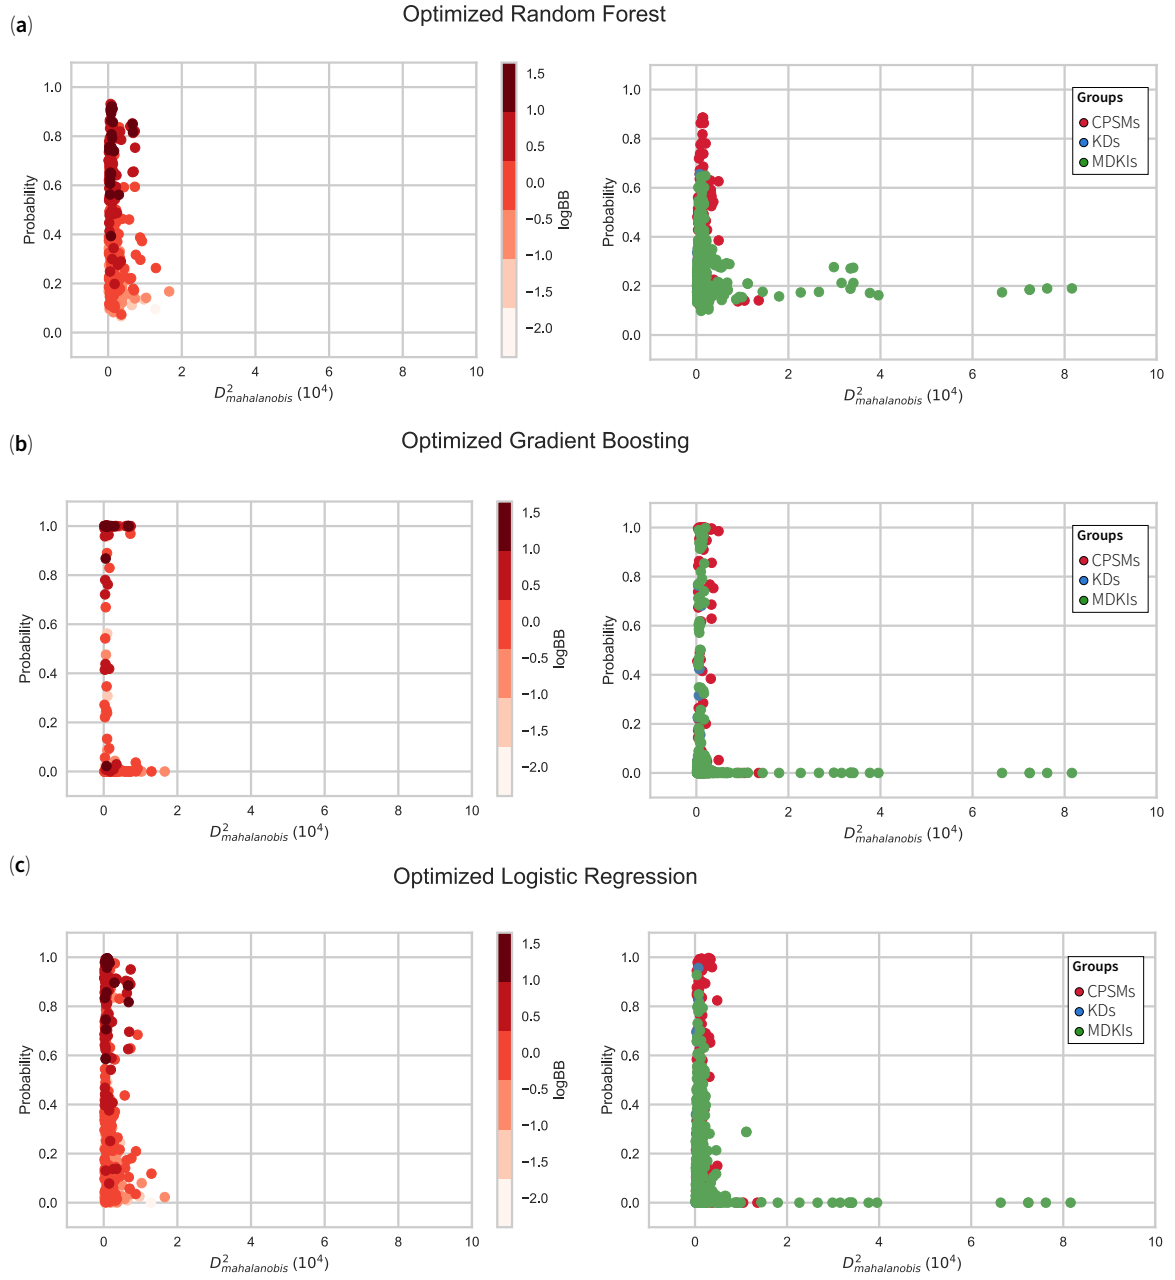

**Figure S11.** Distribution of model set (left) and holdout set (right) with class 1 probability estimates (BBB+, y-axis) and Mahalanobis squared distance (x-axis) for our 3 models: optimized random forest (a), optimized gradient boosting (b) and optimized logistic regression (c) classifiers. On the model set, logBB values were added in a gradient of reds while the holdout set was divided by groups (CPSMs, KDs, MDKIs).

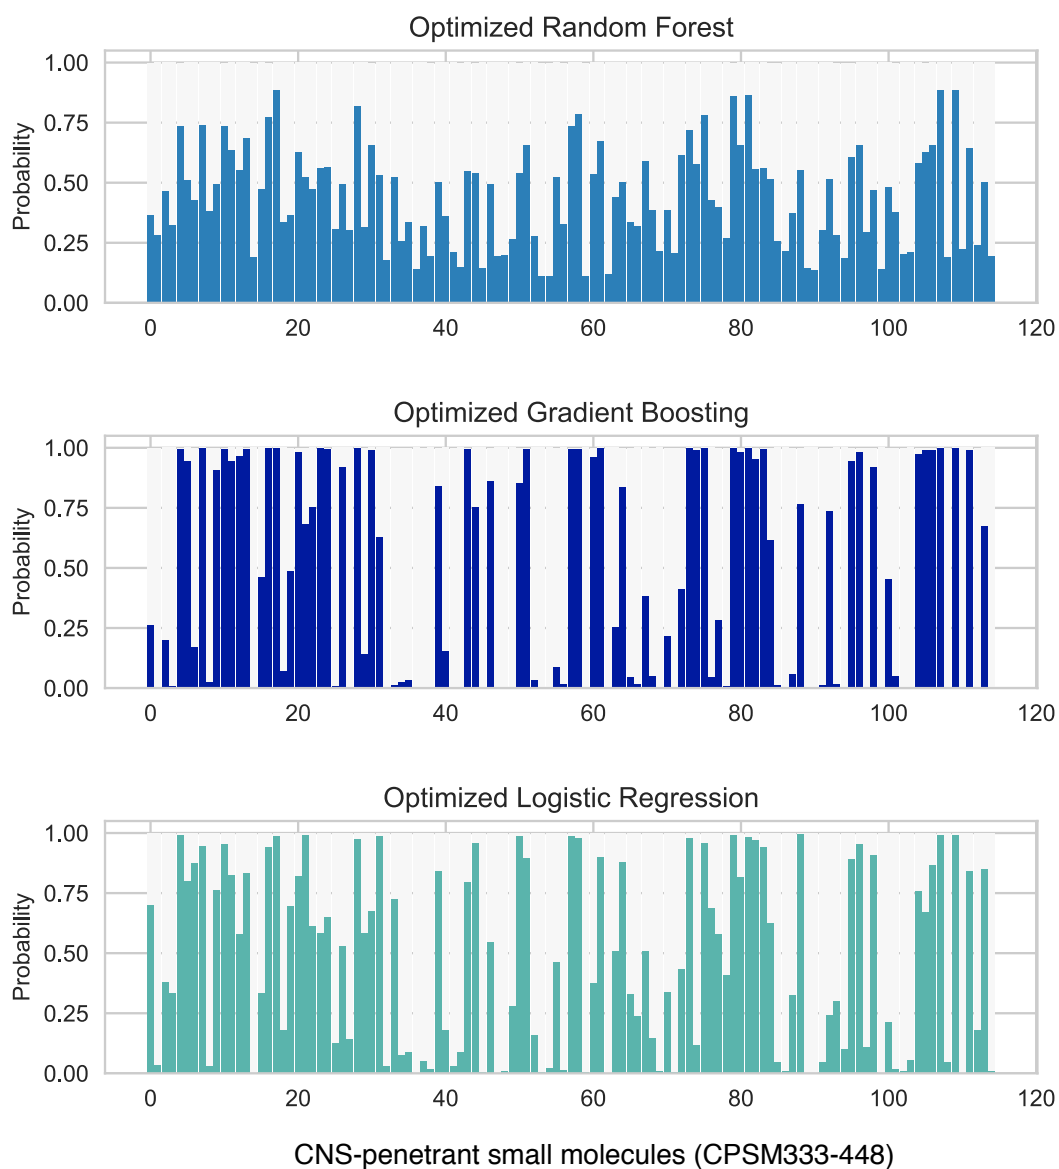

**Figure S12.** Performance results from optimized binary classifiers (random forest, gradient boosting and logistic regression) for 116 CNS-penetrant small molecules (CPSMs). Y-axis represents the probability to belong to class 1 ( $\log\text{BB}>0.1$ ). A compound with a probability value  $>0.50$  is predicted to pass the blood-brain barrier.

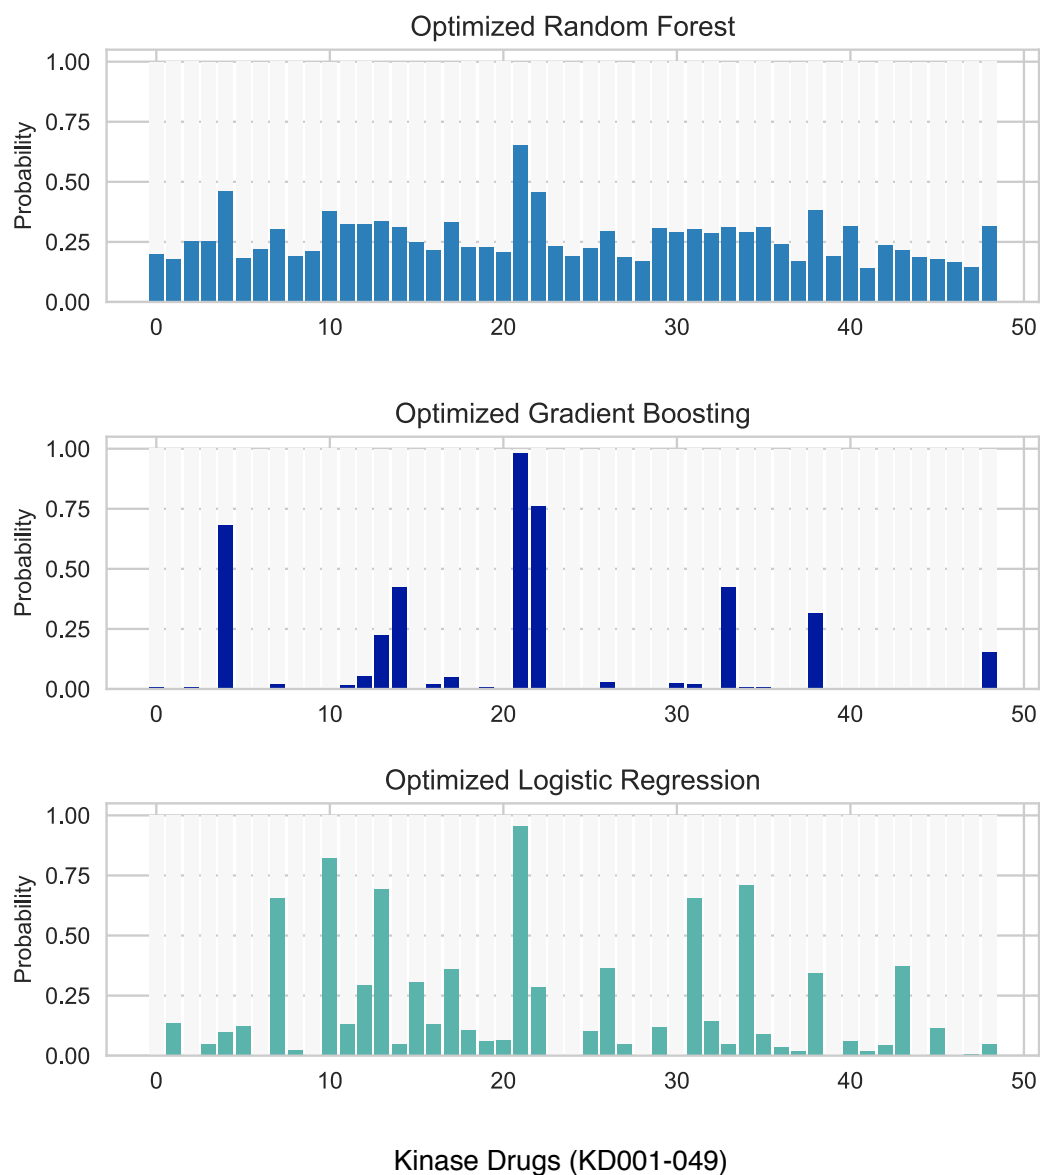

**Figure S13.** Performance results from optimized binary classifiers (random forest, gradient boosting and logistic regression) for 49 kinase drugs (KDs). Y-axis represents the probability to belong to class 1 ( $\log\text{BB}>0.1$ ). A compound with a probability value  $>0.50$  is predicted to pass the blood-brain barrier.

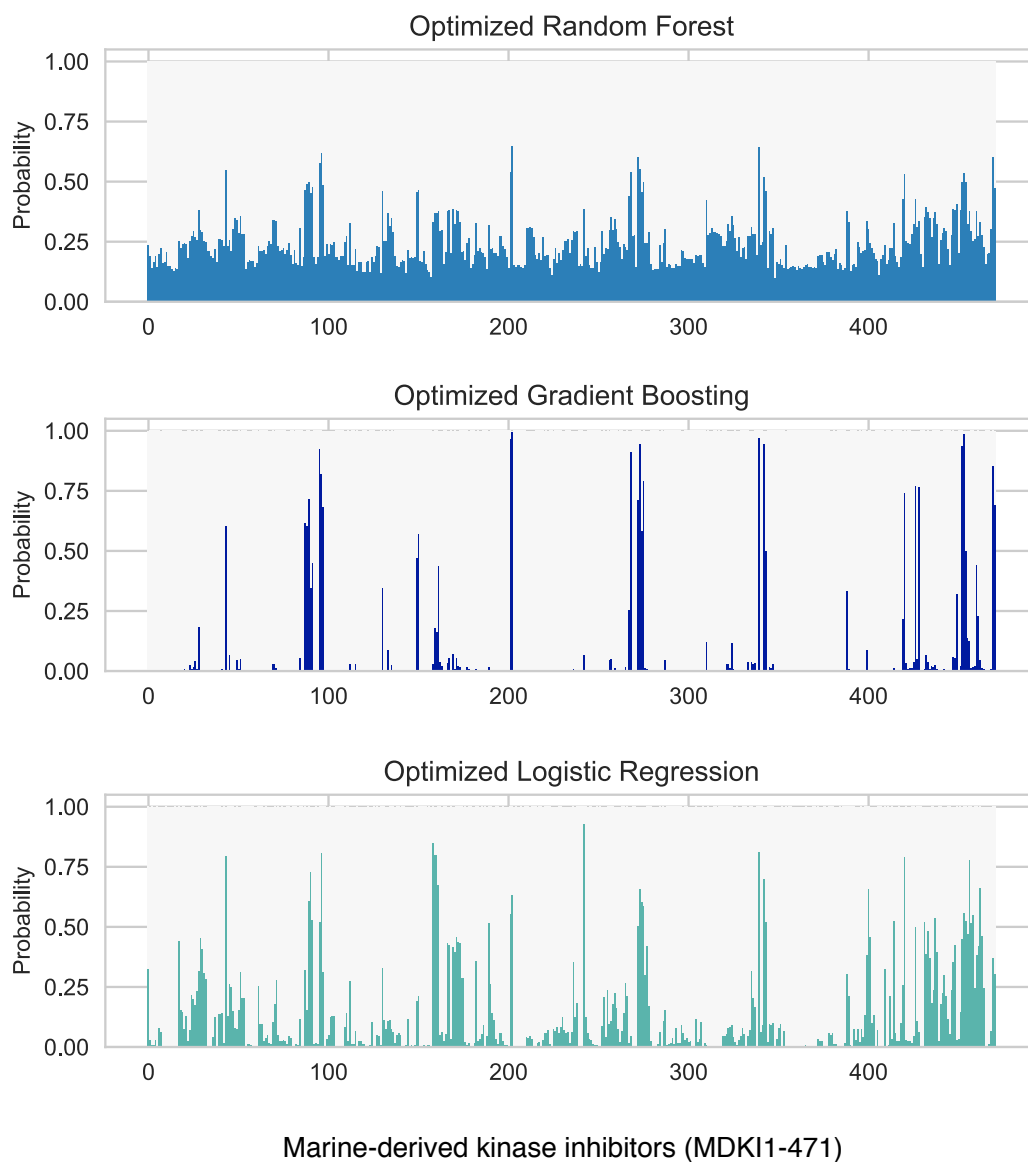

**Figure S14.** Performance results from optimized binary classifiers (random forest, gradient boosting and logistic regression) for 471 marine-derived kinase inhibitors (MDKIs). Y-axis represents the probability to belong to class 1 ( $\log BB > 0.1$ ). A compound with a probability value  $> 0.50$  is predicted to pass the blood-brain barrier.
